# Supplementary material for: Characterization and mutagenesis of Chinese hamster ovary cells endogenous retroviruses to inactivate viral particle release
Source: PubMed Central journal article supplement — Biotechnol Bioeng. 2019 Nov 12;117(2):466–85. doi: 10.1002/bit.27200 (PMC7003738; doi:10.1002/bit.27200), 2019-11-12
Supplement: BIT-117-466-s003.pdf [file BIT-117-466-s003.pdf]

**Supplementary Data file 1. Type C group 1 endogenous virus element ETC109F genomic locus sequence**

59558

DNA

Cricetulus griseus CHO-K1 cell line

misc\_feature

(1)..(30020)

CHO genome outside of ERV on 5' end

misc\_feature

(30021)..(39247)

ERV type-C, LTR to LTR

misc\_feature

(39348)..(59558)

CHO genome outside of ERV on 3'

<400> 1

|                                                                    |      |
|--------------------------------------------------------------------|------|
| tggttctatc gagacagcta catccgcttc tccacacagc ctttctccct gaagaacctg  | 60   |
| gacaagtgag ctttccctcc acctcccttg actgccaggg ctagtgagga ggtcagcaga  | 120  |
| caaacagaac agtgggctct gcgggcaggg aaggcaggct tttcgccgcc actcatcctc  | 180  |
| tgccctgaag gagcttgcca agagggtgcc cttgggttac cgaaatgagc aaaacaagaa  | 240  |
| ctcctgctaa tcaagggctt acatcctagc aatgagcttg agtaatcatg gctaacatgc  | 300  |
| tagaaggtga tatgtgtag gaagaaaatg tagatctggg taatggcaga ttaagagaaa   | 360  |
| cttgagaggg gaaaggcaac ttgcagtttg ctcttgggat gagaggaaac cttgaggaga  | 420  |
| cctgggttca aattctatct ctgcagcatc cagatttgtt tcctctagag acatgaaaag  | 480  |
| agacttaagc ctcaagttca gttagagccc agtgggtcca tctgtaatcc cagcacttgg  | 540  |
| gagtctgagt ctgaaggatt ttgaggatc tctgggctat ataatgagac cccactcaa    | 600  |
| gacaaaaca gccagggtgt gtagctccta actgtaatcc tagaacttgg ctaaggcagg   | 660  |
| agccaaaatc aagccaggta cggatttggg ggcccgtgat ccagtgctt agaaggtaga   | 720  |
| ggcaggacaa tcagttcact gtcaccctca gctacatgcc aagttttatc taacctgggc  | 780  |
| aacatgagac catttcatag aaaaagacca gcctccgttt ccacatctga agactggagc  | 840  |
| agcaatacac tgtagctgct tatcatcaag tacttcacat gtgataagtt gttcctgctt  | 900  |
| ggttatacca cagccacttc tcaatggctc acaatgaagt gagttattgc cattttaaaa  | 960  |
| agagatgaga ggggcaaagg ttaaagact tgccctgagat ctcatagttg atcatcgggtg | 1020 |
| aagctgggat ttgaccatcc agggatcatc tccccctgcc acacatagga atggtgaact  | 1080 |

|            |            |            |            |            |             |      |
|------------|------------|------------|------------|------------|-------------|------|
| gaaactaggc | ccaagcact  | tgatacttac | tgtggcctgc | aggcaacact | ggagcattct  | 1140 |
| gagaaatgac | tagccctggc | cgtgggtgaa | tagggagtgg | ggcagggagt | gggggtgggg  | 1200 |
| tggaggggtg | cagcttctgt | gcttctgtcc | tgttgatctt | ccagcagggg | cccctctcag  | 1260 |
| ttgagatccc | ctagacggct | gaccacaggg | ttctgcctgc | agccctgagg | ttgggctcca  | 1320 |
| gggctgagcc | tgtgtctctg | atccactcta | gctctgtgca | cctatgtaac | aattccatcc  | 1380 |
| agagatacct | ggagacctcc | tgtcaccggc | accggatgct | gccctcggac | aacatgtggt  | 1440 |
| ccagccagag | gtttcaggcc | cacctgcagg | aaatgggtgc | cccaaagcc  | tggcttagtg  | 1500 |
| tcattgtacc | cggcatgaag | gctgctgtga | tccatgccct | gcagacctcc | caagacactg  | 1560 |
| tgcagtgccg | aaaggccagc | tttgagctct | atggggccga | ctttgtgttt | ggggaagact  | 1620 |
| tccggccctg | gttgattgag | atcaatgcca | gccccacat  | ggcaccttcc | acagctgtaa  | 1680 |
| ctgcccgcct | gtgtgctggt | gtgcaagcag | ataccctccg | tgtggtcatt | gaccggcgac  | 1740 |
| tggaccgtac | ctgtgacacg | ggagcctttg | agctcatcta | taagcaggtg | agatgtccca  | 1800 |
| gcacctcca  | caggcaacce | tacagcaaag | ccctggctgg | ggtctgctgt | gagacagagt  | 1860 |
| tcaagactga | ctctacacac | ggggcatctt | aacacagaca | cgtcccactg | gcctgtctcc  | 1920 |
| tcactctgtg | aagatactgt | cctttgagag | ccattaatgc | catgagtttg | tagtcatagg  | 1980 |
| tagtattttc | agaggccctg | ggacctgctc | agtttccatg | gtaattccaa | gcctctaggt  | 2040 |
| agtaacctta | ttctctcatc | tgtaaagtaa | gactgtacct | ggctcctcct | ttgtgtgctg  | 2100 |
| tgagaatggg | tggtttgatc | ttcacacaag | ggtttgctaa | agtaccaagc | tggaggacat  | 2160 |
| agaggatatg | aggccatgaa | cctcaaggcc | tgccatcaa  | gagttaatta | ttagtgtcta  | 2220 |
| tcattgttat | aacgattatt | atgttactca | tcttcttcca | aaaacagatt | tgatcttgct  | 2280 |
| tatttataat | aagtatagaa | ttgcttgggg | tttttgtttt | tgtttttgtg | ggttttgttg  | 2340 |
| agataggggt | tttctgtata | gctttggatc | ctgttctgga | acttgctctg | tagaccaggc  | 2400 |
| tggccttgaa | ctcacctttg | actgcctctg | cctcccagag | gctgggacta | aagggtgtgca | 2460 |
| ccaccattgc | cggacctaga | attgtttttt | atcagccaa  | aaaacattac | cttgccctcg  | 2520 |
| tggcttaatt | ctctctagaa | acacccttag | gagcacacca | ggggcatgcc | ctatagaaat  | 2580 |
| cctaggtttt | ctcagtccag | tctagttgac | aactgatatt | agccaccaca | gctggacatg  | 2640 |
| gggctccacc | ttccacctcc | cagtatttgg | aaggctgaga | caggggatca | cttttagttc  | 2700 |
| aagggagct  | tgggttacac | agtgagttcc | aggctagcct | gggcttcaca | gtgagaccct  | 2760 |
| acttaaaaac | atcatacaaa | caaacaaaca | aacaaacctt | taaacgtatg | tttttaaggg  | 2820 |
| tttctgaatt | ctgaggacag | tttttaagat | ctttgagcta | agattcacca | aggcttaggt  | 2880 |
| ttgctacagg | aagggaaaac | actgatcacc | tgacctgggt | ggcctcatgt | ttcctacagg  | 2940 |

|             |             |             |             |            |             |      |
|-------------|-------------|-------------|-------------|------------|-------------|------|
| tccctgatcac | cttagaataa  | tgtgctggca  | aagggttccg  | tctttgtag  | ggatgccatc  | 3000 |
| actaggtgtc  | cagggtgga   | tccaggcctg  | cgtttttagc  | atgtgcagtt | ctactgagct  | 3060 |
| acacctccag  | cctaaaaaat  | gtaaaggagg  | agatgcatgc  | aggtgtgcat | acacctgtaa  | 3120 |
| tccctgggca  | acagaagcaa  | gaggactgtc  | acaggttcac  | caccacctgg | ttacagggtt  | 3180 |
| tataataagg  | tccctgtcaca | aacaatgtag  | tcttggaaga  | gaggagagga | aatggggaag  | 3240 |
| aggaagtaat  | ttgcagttta  | aaatagagca  | aaattgccgg  | gcgttggtgg | tgcacacctt  | 3300 |
| taatcccagc  | actcgggagg  | cagaggcagg  | cgcatctctg  | tgaattcgag | actagcatgg  | 3360 |
| tctacaagag  | ctagtttcag  | gacagcctcc  | agagctacag  | agacaccctg | tctcaaaaaa  | 3420 |
| aaaaaaaaaa  | aaaaaaaaaa  | agcgaatatt  | gtatggacat  | ggcaacacgt | gcctgtaatc  | 3480 |
| ccaacactta  | gggggctgag  | gttggaggat  | caggagttca  | aagttatcct | tggctgtatg  | 3540 |
| tgagcttgaa  | gccaacctgg  | gcctacagca  | ctgtctgttc  | cacaatctgt | ctttatctgt  | 3600 |
| ttgtctcctt  | atgttgttca  | gctcggctctg | ttctctgaat  | gtttgtctca | gaacaaaaca  | 3660 |
| aattgaatag  | ggctgggcat  | acgcactttt  | caaatgtcct  | ttgtcccca  | ggtatctttc  | 3720 |
| attgctgatt  | tggttttgag  | cttgagggtc  | agtgtacaac  | aaggtgggta | caatgggtggc | 3780 |
| tttgtctgtc  | tctgatctcc  | tttatctagg  | acagtgccac  | tgctgtatcc | ctggcaccct  | 3840 |
| ggtcctttgc  | aggccaggca  | ggccagcctg  | caccaccgcc  | ccacactggt | ttatctgttt  | 3900 |
| ttctccttat  | gttgttcaga  | tgggtctggt  | ctctgaatgc  | cctgtaaact | agaagatagg  | 3960 |
| ctaacaagct  | gatgggggtc  | agggttgaga  | tttttgga    | aaaacactca | tgtgatgcta  | 4020 |
| ggtacctcat  | gtgactgtca  | caaggcaca   | ccaggaatct  | ctagttcca  | atgccgaatt  | 4080 |
| tgaccttaga  | ctaaggtggc  | tgccaccaga  | gccacatcct  | cccctttgta | gcttttttca  | 4140 |
| tttttcttta  | cattatattat | tgtgtttgag  | tttgtacatg  | tgtgtgggta | cacatgccac  | 4200 |
| agcacacatg  | tgggagtcag  | agggcaactt  | atgggagttg  | gttctctcct | cccatcccat  | 4260 |
| gggtcctggg  | gcttgaactc  | agcaagtacc  | ttataagcta  | tctcaatact | gtttgcctcc  | 4320 |
| aaaatgtatt  | actttgtgta  | gctgtccctt  | ttctgttgct  | aataacagaa | tactacagac  | 4380 |
| agtgtgaagt  | acaagaaaa   | taggtcfaat  | tgtatccatc  | ttttgctgcc | catggcatga  | 4440 |
| aaacacttgc  | atcccaacac  | aggccagagg  | tcgctttagt  | gtgaagcagg | attgagtgca  | 4500 |
| tgtctgcatg  | gctaagactc  | tctacttctc  | tggtttctctg | atccctaggg | ctctgggact  | 4560 |
| ctagatcctc  | tggaccctt   | gataatagag  | ggagcttctc  | gtttctcaga | agtgcctttt  | 4620 |
| gaccatata   | cccagaaact  | gattccatcc  | atctctgccg  | tgtgtcacta | gtcactagat  | 4680 |
| ggcgctactg  | tcactctctca | ctagtgctctg | agatggcctt  | gtcttctctc | ctgcccacag  | 4740 |
| cctgctgtgg  | aggtgcccc   | gtacgtgggg  | atccggctca  | tgggtggagg | ctctaccatc  | 4800 |
| aagaagccca  | tagcagcttg  | tcactcggcg  | acagcggctc  | gctcatcact | ccctcatctg  | 4860 |

|            |             |            |            |            |            |      |
|------------|-------------|------------|------------|------------|------------|------|
| ctggcccagc | aaggctgtgg  | ggaaggcaag | gactcaggac | cccctatcca | caggtcagct | 4920 |
| tctaggaaag | atgctggggc  | caggagcctg | ggacacactg | agaagccaga | ctctgcggcc | 4980 |
| accacctcag | tccccggaaa  | ggggaagaaa | ggcaaggcaa | aaagtgccac | agccctggtc | 5040 |
| tgcatacccc | tgcagaaatg  | ggagtcccac | aacaccaggg | tgggccccac | cttcaacagg | 5100 |
| ttaatgtgtc | tgaaacagcc  | tgaggcctgg | ggtagtacca | tgtcccccaa | accccgcagt | 5160 |
| gttcccaagg | ccattttctg  | ctgctctcca | agccctcccc | aagcatctgg | gcttgccctc | 5220 |
| ctgccaaaag | gccaccagtg  | atagcaagta | tgaaccaa   | atctttaaat | acataaccaa | 5280 |
| atgagtatta | caaagtagtc  | accctgccag | gcagttagac | caaaggctcg | gtcctagagt | 5340 |
| gcgcgcccag | agtccagacc  | catgctgctg | ctctagccag | cctttgccct | cacctttctc | 5400 |
| tggagaaagg | tgctgccacc  | atgcccttcc | ccattcctaa | ccagccccct | cagccctcat | 5460 |
| aacgccctag | tgaggtaggt  | gctattgtcc | ccattttcca | gccgaggtag | cagcaagttt | 5520 |
| aaggacgttg | cccgaggttg  | cacagctcag | aaggggcaga | gctgggatgc | agaccaggt  | 5580 |
| ctgttggtct | cccaaccctg  | tgttcttccc | actgcctctg | gaggaggagc | tgggaggggc | 5640 |
| tccatctgcc | cttaccttgt  | atccccacc  | tttacacatg | tactgtggaa | caattggtea | 5700 |
| ggctggggcc | tcaccagat   | cctcacagct | tcccttctcc | cacagccccg | tcctacctcc | 5760 |
| ctagtctcca | ttccaaggcc  | tggctgcctt | cttcccatgt | gctccgacct | cagggccggg | 5820 |
| tcctcagact | accgaatggc  | caactgggtg | gctctaaggc | tctgtcaacc | acaggcaagg | 5880 |
| ccttgatgac | tctacctact  | gccaaggttc | tgatgtcctt | cccacctcac | cctgatctca | 5940 |
| agctggcacc | cagcatgctg  | aagccaggaa | aggtgggcct | cgagctgtgc | ctcacaccct | 6000 |
| ggcgggtagt | gctgagcagt  | gggatcgggg | ctgaaggcca | cgaacagagg | gcagcgctcg | 6060 |
| gaccatacag | cgccccaggg  | aagggttgt  | cttctccaga | accctgttcc | aagacagagg | 6120 |
| cctgatcata | tctctttccc  | tcccctcctt | gcaccgaggc | tgctattccc | ctgcaccttc | 6180 |
| gaggccccca | ctttggaagt  | gcctogaggg | ctctgccctt | tgaagttgga | cctcttccta | 6240 |
| gcaccacag  | gaaagtcaag  | gccaaggcca | agttcaaggc | catactctgc | gacaaagcca | 6300 |
| gggctgaggc | ataccccaa   | aagaggctga | gcctcccca  | acccttgacc | cttattctga | 6360 |
| catgccggac | actgagaacc  | atgggggata | ggaggctaga | gaaaccctg  | ctctgatctc | 6420 |
| tactgcccc  | tcttgatcc   | agcatcaaat | taaaaaaagc | aattaaagtt | ctctggactt | 6480 |
| ggcttgaata | atgtgcggct  | aggctcataa | aagagttgac | cagcagggcc | tccatcagca | 6540 |
| agggccacag | tccccacca   | gcgacagaca | ttggctttct | ctgcagggag | acggatgggt | 6600 |
| gggaaagag  | ccttcaactat | acagatgatg | acactgagac | atggcttgcc | tgagaccaca | 6660 |
| gcaggcggaa | agtcagccat  | caggagtgcc | ccttcccaa  | gacaagctgg | gctggcagaa | 6720 |

|            |             |             |             |             |             |      |
|------------|-------------|-------------|-------------|-------------|-------------|------|
| gagcttctga | tggtcacaga  | acattatgac  | aagagacggg  | ctttccctaa  | acctcagcct  | 6780 |
| ttctccggag | agtatgtccc  | tcagtgaggg  | gtcgggtcaag | acacctcaaa  | ctgcaaaaacc | 6840 |
| caagaaacag | gtcaagtgtg  | gcatttcocta | cctgtagagc  | ctcagctgct  | ggtcctccaa  | 6900 |
| aagcggatc  | tagctgtagc  | gtgtgaatgc  | ttcctgagtg  | gggcagggtg  | gagaggagag  | 6960 |
| tgcgggtgtg | aaatccaatg  | acctgtgtct  | cccaaagtca  | gaagagctca  | tgccctgcaca | 7020 |
| gtggtgtgtg | tctgtcctcc  | caggacttgg  | gaggcagagg  | caggtgcac   | tctgaattcc  | 7080 |
| agtccagcca | gggatatacc  | aagaggccca  | gcctcaaaag  | caaacaaacc  | tcctcgtgac  | 7140 |
| caggagtaca | gcagatgcca  | cctccagacc  | tggccactgt  | tcacttgagc  | agagagcaca  | 7200 |
| gtccctggtc | aacacttget  | ttctcagcag  | atcctcaaaa  | gcagacttgt  | gaggtaggac  | 7260 |
| ttttattatt | ttaagtccag  | agagcgggtca | cctgcccaac  | gccacacagt  | aagtgagtgg  | 7320 |
| tttaactggg | atztatctta  | ggttggtagg  | actaaggagt  | caaagacctt  | gaccgtactc  | 7380 |
| agcaccaagc | ccactgtcct  | tgagctgggt  | cacggccctt  | ctttctat    | tccaattggg  | 7440 |
| ggttaagcac | tgtctatcgg  | tgagagagcc  | gcaggcactg  | caggggtccga | gagaagtacg  | 7500 |
| agggtagggg | tgccacaagt  | tcactagggg  | ggtccctgga  | tctggtgcct  | gggaggagga  | 7560 |
| ggcgggtgca | gtgcaggtgc  | aagggcatct  | gggccacctg  | ggaaggacgc  | aggcgaaggc  | 7620 |
| gtctgaggag | agcttcgtcc  | agcacctgga  | gtgggaaaga  | cagcagccca  | cctgagttcc  | 7680 |
| agccagagga | gcccctggct  | ctgatggacc  | tctctggtct  | gcaactgcca  | tcattttctc  | 7740 |
| aacaggcagg | cagggatttc  | tctccacaca  | gagctaagtt  | acgtttcagc  | tccttttgtg  | 7800 |
| tttagtgaag | ccatgtgatt  | aagccactca  | ccaatgggat  | gtgaggaaaa  | cacagaccta  | 7860 |
| gccctcaaag | ccccgattca  | caaaaacatc  | cagtctcccc  | ttatggccag  | gaagcaatag  | 7920 |
| cccttttctc | caagtggcta  | cccagagtca  | ggtccactcc  | tactgtatgc  | ccatttgcca  | 7980 |
| gacttaatcc | aagaagaaac  | aatggacttc  | agggcctgtc  | agaggtcagc  | tccccactcc  | 8040 |
| ttgagctaac | agacagaagg  | aagcctgagg  | aagtcacagc  | accacagagg  | caagggtggc  | 8100 |
| cccagaggcc | aagcctgttc  | ccccaatcc   | ctaaatacag  | agcaggcatg  | tgggcctgaa  | 8160 |
| gacctacctg | tctctggagc  | ttggtggtct  | tggctggcca  | cagaaagcgc  | tggcccagaa  | 8220 |
| cgggtgccac | tcgaggagca  | taggtgtggt  | ccccaaagcac | tgggcagagc  | tgtagagcca  | 8280 |
| tgtgcacctg | aagctgactg  | gggaacactg  | aaagatgggg  | ggaggcagtt  | gctcttcttg  | 8340 |
| atcatcaagg | actgtcccca  | ttcccagagc  | ctgtgcatct  | atgaggtgac  | ctctgcctcc  | 8400 |
| acagagggcc | atgagcagat  | caggacaatg  | acagctggca  | accttcccag  | cctgggggca  | 8460 |
| ttgaacccaa | cagaactgaa  | gctcctggga  | ataagtatgt  | gggttgggtg  | ctaaaactgtg | 8520 |
| ggtgtgcacc | taaaaactctg | cctcctgctg  | agcccactct  | cagagtcccc  | agatgctctt  | 8580 |
| ttttttttgt | tttgtttttt  | gttttttcag  | gcggggtttc  | tctgtggctt  | tggaggctgt  | 8640 |

|            |            |            |            |            |             |       |
|------------|------------|------------|------------|------------|-------------|-------|
| cctggaacta | gctctttag  | accaggctgg | tctcgaactc | agagagaggt | gcctgcctct  | 8700  |
| gcctccccag | tgctgggatt | aaaggcatgc | cccaccaccg | cccggccacc | agatgctctt  | 8760  |
| tggatgttgc | aaaacaacat | cttctcata  | ggcttcattt | cccctgcaga | gtactgttca  | 8820  |
| gccctacctg | tcagtggctg | cagctggacc | agagcacagc | cacagcctgt | ggccatcaca  | 8880  |
| tggaaatggc | tgagggtcct | cttgacacct | tctaggatgt | cctttcgaga | tggggatgtc  | 8940  |
| acggggatgg | cctaggatac | cagtcaagaa | tgacttagca | cacacgtagg | agcccaattg  | 9000  |
| agccaccctt | gctgccggct | gacttaggac | agggcctcag | aacaggcagc | agcaacttgc  | 9060  |
| ctgttagagg | acaggggaat | agccaccca  | tgacatatag | gcagactcct | ctgtaaggca  | 9120  |
| aaacctgaaa | ggactcctag | tggcttctga | ctcacaagat | caatgccatc | catgcgttcc  | 9180  |
| agcttcaggg | ccacgtggat | agtcccctca | gaaggctcag | ggatgccatc | agtgatgcca  | 9240  |
| ctgagaaaga | gaaaggaagt | ctcagagcag | ccagctggga | ccttccttgg | ccctgggagt  | 9300  |
| caccccgcat | ctctcaccag | taggtggctg | tgggcctctg | tgttctcctt | gagtgaacga  | 9360  |
| agaacttctg | caagcggctt | gctgtctggg | ggcagctgga | gagaagcaca | agcccagacg  | 9420  |
| cctccctgaa | agaagaggac | aagtcacata | aagcctcttg | gttggaaaaa | atgagggcca  | 9480  |
| gattggctgc | tctgcagag  | gactagcact | cggcaccac  | atagtgggtc | ccaactgtaa  | 9540  |
| ttccacttcc | aagagagctg | atgccctctt | ctggcctctg | gggcaccggg | catgcaactgt | 9600  |
| ggtacacaga | cacacatgca | ggctggcctc | cgggggcaca | aggcatgtgt | ggtgcacgga  | 9660  |
| catacatgca | ggctaaacac | acatttaaaa | acaatctttt | ggtctttttt | aaaggagacc  | 9720  |
| ctcccaccaa | ggggctggag | aatgaatca  | gtggttaaga | gcactagctg | ctcttccaga  | 9780  |
| gtacctgggt | tcagcaccca | catggcagct | cacaactgta | gctccagttc | caggggatct  | 9840  |
| gagaccctca | cacagacaca | catgcaggta | aaacaccaat | gcactatata | tatatatata  | 9900  |
| tatagataga | tagatagata | gatagataga | gagagagaga | gagagaccac | cttcccactt  | 9960  |
| ccccaaatga | acaccaggac | tacagtccag | acctaagaaa | caaatcctgg | ccaggcagtg  | 10020 |
| gtggtgcacg | cctttaatcc | cagcacttgg | gaggcagagg | caggcgcatc | tctgtgagtt  | 10080 |
| cgagaccaac | ttggtctaca | agagctagtt | ccagggcagc | ctccaaagct | acagagaaac  | 10140 |
| cctgtctcaa | aaaaaaaaaa | aaaaaaaaaa | aaaaaaaaaa | aaaaaaaaaa | aaaagggggg  | 10200 |
| ggaaataaac | aaatcccaag | accttttttc | tggccccag  | agaactcaga | caaatgccct  | 10260 |
| aagagttact | acacatgcca | ggcacctgaa | taggactctt | atatacagtg | ggtgtaaaat  | 10320 |
| aaaggcccac | cacactcctc | acttactttc | caggtgctcg | cacaacctgg | agctccccgt  | 10380 |
| gtttgagccc | cagggcctgg | ctcagctgtg | gcagcacaga | aagcaaggtc | agctccccag  | 10440 |
| gtctccctga | gaagtaagag | ggagaaaaca | agttgccaga | gcaccatcca | acgaactcct  | 10500 |

|            |            |            |             |             |            |       |
|------------|------------|------------|-------------|-------------|------------|-------|
| ccccaccagc | ctttccctcc | ttgtccctgc | ccatacctgt  | cacaggcaga  | ccctgtggct | 10560 |
| tgttcagtgt | caccagaggt | cctgaaatat | tcggtagatg  | tcagcaaaag  | cagggcagcc | 10620 |
| tgtgtgcatg | cagcctctgg | ttataagctc | ccaagcccac  | tccaaactga  | acttcctgct | 10680 |
| ccccgcaccc | agggcctttg | cacctgctgc | cctgagcttt  | cattaatatt  | gggtccctta | 10740 |
| tcacacacct | ccctataatg | tgtgcccctc | ctacagtcc   | tgactgtttg  | gtctgagacc | 10800 |
| agctcaaaca | ggccggcctc | aaactcaact | ataggtaagt  | ctggcttga   | actcttgatc | 10860 |
| ctccttgctc | ctgtctccca | agttctggga | ttacaggtgt  | ggtcaccact  | cccagaaaca | 10920 |
| gcagagattc | actattcctc | acatcagaac | gcttgctctc  | tcaaggcagg  | agccagccat | 10980 |
| atztatccca | gtactgtgta | gcctcctcat | tgctacaatg  | cactgaagtt  | cagcaaagtt | 11040 |
| gtcattccta | aaggcacaca | gcatgctgct | tacagacccc  | aggaaactaa  | cttctgctcc | 11100 |
| cgagggctct | agaatgcgag | gcgggtgtaa | ggtttcctat  | gcctggcggg  | gggaatgtga | 11160 |
| cggtacaggg | ggtccgactc | cagggggctg | gaggtccct   | caccttgctg  | atccaccaca | 11220 |
| gctgccctca | gcacctcagc | cagctcctcc | gggccgaggt  | tctctgttcg  | cagaagcccg | 11280 |
| gggaagggct | ggtcctccac | tgcgtccttg | cacttgctgg  | aaccttgagg  | ttgaggccga | 11340 |
| cccctgagaa | aaacgacaga | agccggtaac | tccaacgccc  | acgctgccc   | gtgcagcctt | 11400 |
| ttcgtacaca | accctcagaa | cccccgctc  | ggctgacagt  | tgtgggtccac | aggcccccaa | 11460 |
| gactacagaa | ggggcatcag | acgctcggag | cgccaaccat  | ctcgtgtcgg  | gtcacacaac | 11520 |
| gcggctggga | ttagaaccca | tgtcctgac  | tgagtgcccg  | acctgccctc  | cccttgtcct | 11580 |
| agcctccctc | ctacacggaa | gtggtgagtt | ataatcaccg  | ggcctcggtg  | ccgaagcctg | 11640 |
| catctctcgg | ccgtgcgcca | gccgccagcc | ggggccgcca  | ggtgccagac  | acacaacgcc | 11700 |
| aaacgcggaa | gacgccatc  | gccgcagcaa | gcacagacgc  | atgcgtgtcc  | acggactgcc | 11760 |
| ccaccgcgtg | catcctccgt | gcgccgattg | gtcagcctgg  | ctgtcaatca  | gagcatcgag | 11820 |
| caggcggagc | ttcgaggacg | gaagagccaa | actttccttt  | ggctgaggaa  | ggtaaagtac | 11880 |
| ggtctccggc | tctgctttgg | gggaaactga | ggcaggaggc  | gcggttattt  | actcgcggta | 11940 |
| gaggacgtgt | cttagaatag | aaagaggcga | gtttgcagat  | agattgtttc  | agttctcagg | 12000 |
| acccttaatc | tgaaacccat | ccttgtaaag | cagagggaga  | aggtgaagcc  | ccacagcctt | 12060 |
| cgggccaggg | cacctgcatg | gaaatggtct | gcgacattaa  | ccatcccatg  | actgtggctc | 12120 |
| aggtggtaga | gagatTTTTc | taggatgcac | gagttcctgg  | gttcgatccc  | cagcaccaca | 12180 |
| cgaagaccaa | gatcacagat | acagactgag | ttggagacca  | gcctgggata  | tgtaaggccc | 12240 |
| ttctatcaca | agaaaaaaca | actaggccgg | gtgtgggtgg  | gctcttcttc  | aacagaggcc | 12300 |
| aacctggtct | agacagtgag | tttcaggaca | gccggagcta  | cacagagaaa  | ccctgtcccc | 12360 |
| ccccccaaa  | aaaaaaagaa | aagaaaaaca | agcttgggtgc | ggtccacata  | gtaagttcca | 12420 |

|            |            |            |            |            |            |       |
|------------|------------|------------|------------|------------|------------|-------|
| cactggccag | tatgttgtta | attccaaaga | tggaatgagt | gtaaggaaaa | aggccagcca | 12480 |
| aagaaacaca | ctttggctct | gcaaccagaa | ccaaagaaat | gcacccttgt | cagaagccag | 12540 |
| ccttggtgac | gcccccccc  | ccaatgcta  | gctagccgcc | agctagccta | gcatcccacc | 12600 |
| cctcaggttc | caggacctgg | cctgagaagc | aactaacacc | ttccccatt  | tccttagtta | 12660 |
| gtgcttgaga | taaacadagg | agattccaga | tacctggcct | gagaagcaac | taacacctat | 12720 |
| tctttctcca | cacaggagat | tccgataacc | tgctgagag  | caattaacat | tcattcctcc | 12780 |
| cccacctcct | ttttctctgc | ttcctccttt | ctctataaaa | acccttgta  | ataatcaata | 12840 |
| aatgggcctt | gacaagaaaa | cctgcttggt | cccgtctttt | ctttcccgcc | catcattttc | 12900 |
| aggcgtgatc | cacctcggac | tcaggaatta | ccggagcccc | gagggccggg | gtacaccctg | 12960 |
| accctgaaac | cagtgccaga | gaaacacact | ttggccctgg | aatcagagcc | agtgaaagaa | 13020 |
| atacaccctg | gctctaaaa  | cacagtcaaa | aggctaaaaa | ggaccagtga | aaggaacaca | 13080 |
| ctttggccct | gaaaccagag | ccaaatctaa | ccctaaacct | gtgcagaaaa | ccaaccaatc | 13140 |
| cctgagcagg | agatctagcc | attctgagct | cagggattga | aatctgacca | atccccacc  | 13200 |
| tggaatctc  | cctgggaaaa | ctctgcccc  | ccctaagaat | ccctatataa | accctgtgcc | 13260 |
| tgttcagctt | caggctgcct | ggctgcctc  | tgccactgga | ttcttgaatg | aggtttgggt | 13320 |
| aagaactttc | gccggagcag | agaccacct  | acacactggc | tctccagggg | actggagttg | 13380 |
| aactgttaca | atttaaccag | ggaaacctc  | tcctcccaaa | gcagagctga | tacactgagg | 13440 |
| aaggcctttc | cctgaagcag | ggctgtaagc | cgctatgctt | actgtgacct | gtggcattcc | 13500 |
| ttggctccta | aacgccagaa | tacctttcca | tcccagctgt | aacactcagt | attctgtgac | 13560 |
| tccggagtgc | cagaatactt | tgcatctgag | ccataacaca | gtattctttg | gctcccaggt | 13620 |
| accagaatcc | attccttccc | atccaatccg | ttgaaatgct | tacaatgaga | aaaaccacga | 13680 |
| accxaaatca | ttgagaccaa | attaattaa  | gttttttttt | cattcatgta | cgagactgcc | 13740 |
| tcccccaagg | cctgatttga | gaggtcagca | ttggatgtga | ggaagacaag | ggggttttgt | 13800 |
| tgttttgggt | ttttgagaca | gggtttctct | gtgtagcttt | ggagcctgtc | ctggaacttg | 13860 |
| ccctgtagat | taggttggcc | tagaactctc | agagatctgc | ctgcctctgc | cacttgagtg | 13920 |
| ctaggattaa | aggcatgtgc | caccaccgcc | tggcctcacc | tggatcacac | agacacatat | 13980 |
| atacataatt | aataaaatac | agacctggcc | tttaatccca | gcactaatct | acatagtgag | 14040 |
| ttgcaggaca | accagagtta | catgacctg  | tctcaaaaaa | aaaaaaaaaa | aaaaaaaaaa | 14100 |
| acaacctaaa | taaataaaat | gcagaaagta | acaatatgta | cataataaaa | ataatgaaat | 14160 |
| aataacataa | ttgaggaaca | gtggggcatg | gtggcatgtg | cctttaatcc | catcacttac | 14220 |
| tgatctacat | cccaagcctg | aaggaccttg | ctgaaagggc | tccagcacta | gactgttgct | 14280 |

|            |            |            |             |            |             |       |
|------------|------------|------------|-------------|------------|-------------|-------|
| tctggcagag | aaagtggctc | tcaacctgct | ggtcaacgac  | ccctttgggg | gtagaagggc  | 14340 |
| cctttcacag | gggtagccta | agaccatcag | aaaatacaga  | tattcacatt | acaattcata  | 14400 |
| acagtagcaa | aattacagtt | ataaggtagc | aacaaaaata  | attctatggt | taggagtggg  | 14460 |
| tctccataac | atgaggaact | gtattaaag  | ttgcagcatt  | aggaaggttg | agaaccacca  | 14520 |
| atntaggggc | agatgctgcc | tccttcacag | cactcagcca  | cagttgtggt | gtgtccttgt  | 14580 |
| tgaggttcta | tccggtcctc | caaagttcag | ctgtgggaaa  | ctaaatcttt | aacttcataa  | 14640 |
| taatggtaat | tggaggctgg | agtaattagt | accagataaa  | atcatgaaga | gtgtgcttcc  | 14700 |
| atgatggcca | ttaacagctt | tctaaggaga | gcagagaaaa  | aaaccttttc | ctcgttgtgg  | 14760 |
| aatgacttcc | tccgtgttgg | tgtgcaccag | aaaggccccc  | tgcttgtgct | aagtggagct  | 14820 |
| atgccatgct | cttggactct | gcagcctcta | gaaccatgat  | ccagatcaac | tgtgtgtctg  | 14880 |
| tgtgatttgt | tttattttta | ttatgtgtgc | atgcctgtgt  | gtctgcgtaa | gtgtatacca  | 14940 |
| tatgtgttgc | aggtgcacgg | agaggccata | aaaggggcat  | cagatcctcc | gaagctagag  | 15000 |
| ttttaggcag | tcgagagcct | ccacgtgggt | gctgggaact  | gaactcagag | cctctgcaag  | 15060 |
| ctcagccagt | gctcagccag | tgctcctcag | tttgtgtgct  | tgttttcagt | actgcagatg  | 15120 |
| gatccaggac | cccacacgtg | ccaggcaagc | attctctcac  | tgagctgcac | cctcagactg  | 15180 |
| gtctcaggtg | gtttgttata | gcaacagaaa | acagacatgt  | ggaaggagtg | atggcgtatc  | 15240 |
| ttgactgaga | ggaggaataa | cttggctact | cgcacagcac  | atgtctgggc | aggttcacia  | 15300 |
| ggaggcttcc | agggacaatt | ggcacctaag | aacctgacc   | taatgaatgg | atgaaccatt  | 15360 |
| cagaatttgg | atgggttctt | gggggggggt | gagggaaactg | tggtgggtgg | ggactgcttg  | 15420 |
| gaggaagtag | ggtgtttggt | gtgggtggct | ctcggaggct  | atgtcttaca | ttggctcctt  | 15480 |
| tctgttttgg | ttctttcaat | ttcctgttgt | gtgctattct  | gctacaaccg | cctcaccag   | 15540 |
| tagattgcag | cctctgttaa | tcaagacag  | gtcttactgt  | gtagccctgg | ctggcctgga  | 15600 |
| actcatagag | atctgtttct | tctgcctctt | gagtgtgga   | attaaagacg | tgtgccacca  | 15660 |
| ccaccacctg | acctagagga | caactttatt | ttttttaatt  | ttttatttat | tatgtacaca  | 15720 |
| ttgttcctgc | ctgcgcacca | gaagagggca | ccagatctca  | ttatacatgg | ctgtgagcca  | 15780 |
| ccatgtgggt | gctggctact | gaactcagga | cctctggaag  | agcagccggt | gctcttaacc  | 15840 |
| tctgagccat | ctctccagcc | ccctggatga | ttaattgtag  | aagtttcagt | tctttctttt  | 15900 |
| tgtttttgg  | ttttgagaca | gagtcacact | acgtatcttc  | aactgatctg | gaacatgcta  | 15960 |
| cgtagacaag | gctggcttca | aatgtgtgtc | aatgttcctg  | cctctgcttc | cagagtgtctg | 16020 |
| ggattatagg | catgtcccta | aatctgttat | ttttttaaac  | acttattttt | gagggggagt  | 16080 |
| cgggtgggtg | gctgttgtac | gtacatatgt | agagatcaaa  | gggcatcttg | tgggagtctg  | 16140 |
| ttctctcctt | ccaccaatgg | gttctaggg  | ctgaattcag  | gttctggagc | ttgacagcaa  | 16200 |

|            |             |            |             |             |            |       |
|------------|-------------|------------|-------------|-------------|------------|-------|
| gcaccttaat | ctgctacaac  | atcttgttgg | tactaaatcc  | atggagaatt  | gaaaggattg | 16260 |
| tttattgttg | ggcccgggaa  | tatagctctg | tggtagtaga  | atgcttgccct | aatatgtgtg | 16320 |
| agattcttaa | aaaatcattg  | attgttttct | taaaccaact  | ttttaatttg  | ttaaaaccaa | 16380 |
| cttttaaagg | atatatctag  | gcatggtggc | acacagcatt  | aaccctagca  | cttgagagat | 16440 |
| agaggcaggc | agatctccta  | tgaatttgag | gccatcctat  | tctacgagtt  | ccagtacagc | 16500 |
| caggactaca | ggactgtgtg  | atatgcacaa | cacaggaagg  | actgatgaca  | aatttggtaa | 16560 |
| aaaaaagaaa | gaaaaacagc  | aagtggtttc | acattgtccg  | gcttcacctg  | gagtgggtga | 16620 |
| ctgtgggtac | tcctgaagcc  | tcccaggagt | gggtgactat  | tctgtcagac  | tgtgggtatt | 16680 |
| cccgaagcct | cctaggaggc  | ctcctgtgca | tcacagaagt  | ggcttgagca  | agaacttggg | 16740 |
| acagactggg | caagtgcaca  | gctataatcc | cagcactgca  | gaggtgaggg  | ctgatgggtc | 16800 |
| aggagctcac | agttatcctt  | gactacagga | agtctgaggc  | cagtctgagc  | tatgtgagac | 16860 |
| tctaaaacat | acatgagtca  | gtgagttggc | tcagccagta  | agggtgcttg  | ataccaagtc | 16920 |
| tgaccacctg | agtctgatcc  | ccagaatcca | catggtagga  | gcagagaacc  | aactcccagg | 16980 |
| agctgtcctt | tgacctctgg  | acttatgcta | ttgcatatgc  | ataccaatac  | ataactccct | 17040 |
| aaaatacaaa | atacatatgt  | ttgggctttt | tgtttgtttt  | gttttgtttt  | ttcgagacag | 17100 |
| gtttctctgt | gtagctttgg  | agcctatcct | ggcactcgct  | ctggacacca  | ggctggcctc | 17160 |
| caactcacag | agatctgcct  | gcctctgcct | cccgagtgct  | gggattaaag  | gcgtgtgcca | 17220 |
| ccaacgcccg | actgatgttt  | gggctttttt | gatggttttt  | atgtgtgtgt  | gtgtgtgtgt | 17280 |
| gtgtgtgtgt | gtgtgtaatt  | agaaggagaa | agagagagag  | ggagagagag  | acagagagac | 17340 |
| agagacagag | acagagacag  | agacagagac | agagagagga  | gagagagcca  | aagtctggtt | 17400 |
| tgtggcccat | tcaactaagc  | agacttctcc | tccaccaatg  | gtgtccacca  | atggcccagg | 17460 |
| aaaggccatt | tccccacttg  | aaccagcgcc | tggccctctg  | gagggttagt  | tcctttactc | 17520 |
| tttgagggtc | tcctccctg   | ccccatagca | ggctgccctc  | tcttgctccc  | ttcccacagg | 17580 |
| cagctacctt | catcccagtg  | ggctatgagc | tcctggaaga  | aaaggaggag  | ccaaattttg | 17640 |
| cctaggctga | gggctcagtg  | ccaggtggca | gccacagtca  | actgctgaac  | ttgtgaaact | 17700 |
| ggaccccagg | agaagaagcc  | tgggacaaac | atcagcttgc  | atcagctccc  | tctggctcag | 17760 |
| ttacagcttt | gcagcagggtg | tggacaggct | gggtgcttcag | caatgggaaa  | caggactgat | 17820 |
| gcaaaccagg | cctccaggag  | gccaagccct | ggagccagcc  | tgcaagtgaac | cagcctccag | 17880 |
| ccacatctac | aactgtgtga  | gggcctagaa | tagaaagtgt  | acttgacctg  | tctgtccttg | 17940 |
| agtgtctctc | tcttctcaca  | cttggtcca  | ggcatggggc  | agcttccagc  | gatggctttc | 18000 |
| cagacaagct | tgagtaactt  | ggccctttgt | cttagtgttt  | tctaaatcca  | aataggcttt | 18060 |

|            |            |             |            |            |             |       |
|------------|------------|-------------|------------|------------|-------------|-------|
| acagggagga | ttgtgaaatt | atgtagctt   | tggatctgag | agccagactg | aaacctggct  | 18120 |
| tcctacaggc | ctagtctttc | ctgcttaggt  | cagttacctg | tcactaataa | atgggggctc  | 18180 |
| cttttcctac | cagccaccaa | gatggctgaa  | gtggaggaga | agaaatgaac | cttccacaaa  | 18240 |
| ttcacatact | acaatgtgga | cctggatcag  | ctggtgacag | gttctaggaa | ctgctgatgc  | 18300 |
| agttgtacag | cacccagag  | gtggtgtctg  | aaccacggcc | tgtggcagaa | gcagtactcg  | 18360 |
| ctactcaaac | acctgagaaa | gctcaagaag  | gaggcaccaa | ccatggagta | acccgaggtg  | 18420 |
| ctgaagacc  | acctgagggg | cacgatcatc  | ctgcctgaga | tgggtgtgtg | gtacaatggc  | 18480 |
| aaaaccttca | gccaggtgga | aatcaaacca  | gagctgatca | actgctacct | aggcgagctc  | 18540 |
| ttcatcacct | ccaagcccat | gaagcatggc  | cagcctggta | ttggtgccac | ccactcctcc  | 18600 |
| agctgcatcc | ccctcaagta | gctgtggcca  | acaagactc  | atgtttaaaa | agaaaattgg  | 18660 |
| aagccaggca | ttggtggcac | acgccttta   | tcccagcact | cgggagacag | aggcaggtgg  | 18720 |
| atctctgtga | gttggaggcc | agcctggtct  | ccagagcgag | tgccaggata | ggctccaaaag | 18780 |
| ctacacagag | aaacctgtc  | tcgaaaaacc  | aaaaataaat | aaataaataa | ataaataaaa  | 18840 |
| taaagaaaag | aaaagaaaag | aaaaatgggg  | gctcactctg | agaagacctg | actcctcctc  | 18900 |
| ctcctcagaa | ctctctggtt | tgtttttgca  | gtgctggggg | cactgtgcca | ggctagagac  | 18960 |
| tcactgcaat | ctgaggggtg | aagtgtgag   | caggaacagg | gaactgtgta | taagctggca  | 19020 |
| taggcattga | taaattcccc | tgtagatgga  | ccaggacctt | tcaacccgaa | cacatggaaa  | 19080 |
| gttattgtaa | aatacaacag | ttgggaatca  | aaagagtggg | ttgatccacc | ttacaggcaa  | 19140 |
| atctcattcg | gaaactgaca | acacatatgg  | atcatgtggg | ctgcctgaat | atcaaatatg  | 19200 |
| gcaggcctca | aaaatcaact | gcagatttta  | atataacatt | taattattca | tctattaatt  | 19260 |
| aatttattct | gtctcataat | atcaaacctt  | atctattaaa | agggagcagg | gctggggatg  | 19320 |
| tggctcagtt | ggtagagaat | ttgcoctagca | tgctggaaac | cctgggttcc | gggttcaatc  | 19380 |
| cccagagcca | cataaattgg | atgtggtggt  | tcacatctgt | aatgctagca | cttaggaagt  | 19440 |
| ggaaacaaat | ggatcataag | ttcaagggtca | tcctccacta | cataataaat | ttggagccag  | 19500 |
| cctaggcttc | tgtatctaga | agaaaaaaca  | gggcaccact | gatgcaactc | attgcataaa  | 19560 |
| agcaattgct | gtgtgagcct | gacaatccaa  | gctcaatcct | tagaaccaag | agtggaatga  | 19620 |
| aagttgtctt | ctgggccatg | cacgcctttg  | atcccagcac | tcgggaggca | gaggcaagtg  | 19680 |
| gatctctgtg | agttcgaggc | cagcctggtc  | tacagagtga | gttccaggat | aggctccaaa  | 19740 |
| gctacacaga | gaaaccctgt | ctcaaaaaaa  | aaaaaaaaaa | aaaccaacaa | aaaaaagaag  | 19800 |
| gttgtcctct | gacctccaca | cctgcacccat | agtactggca | taccaacaca | cacacacaca  | 19860 |
| cacacacaca | cacacacacc | agtaatgaca  | aatgctatct | cctgtaattc | tcggcaaata  | 19920 |
| gtttcaaca  | aagaacacag | gcaaagatga  | ggtattggca | taaataatth | acttcaggct  | 19980 |

|             |             |             |            |             |             |       |
|-------------|-------------|-------------|------------|-------------|-------------|-------|
| ctaataccat  | acattagtgg  | ggaatgagaa  | caaaaggagg | aattgtctga  | cttcccctgg  | 20040 |
| ggatcacaaa  | ctctatccat  | tcggccccagc | aagggcgcca | atgaaagggtg | aagaagccac  | 20100 |
| gattccatcc  | aagtccagct  | tggatgaaccg | gtgagtttac | taggttactt  | acaggtgggg  | 20160 |
| cctgggtgac  | tcaaaatcac  | aggtgactcc  | ctccaaatct | gcatcagtga  | catcctggct  | 20220 |
| ttagttaacc  | ttttacctct  | tatatactct  | agcaccgccc | caagatcatg  | agcagctggg  | 20280 |
| gcgggggcagg | agggaggaat  | ggctgggatt  | tcaggtgcta | agaccccctg  | acactctcct  | 20340 |
| ccctttctaa  | tacaggtggt  | aactatctcc  | ataccctagc | cataggcctc  | accgtcactg  | 20400 |
| tggcatttg   | ttcattttgt  | tgtcttgatt  | caggtcaaag | tattctggag  | gccaccatag  | 20460 |
| caatgtctgt  | tgcttgatga  | gcatggtcaa  | ggcaggagg  | gactgcagag  | agggagtggc  | 20520 |
| acatagggat  | ggcatgtgaa  | gaccgagtgg  | cagacttggg | gccaaagcct  | gccagggaca  | 20580 |
| agtgtttgtc  | ccctaaacta  | cctgtgacat  | gaaggaagga | actgagccag  | gctaggaagt  | 20640 |
| tctcccgtga  | ccagcccacc  | ccagagctcc  | agcccttctc | gcagtttctc  | tgggtgctgtg | 20700 |
| ctgtgagagg  | ggtgcaggtt  | ggtgagaagc  | tctccagctg | ccaggcttgt  | gggtgcttct  | 20760 |
| agcagagtgc  | aaggtctcca  | gtcacatcct  | tggctgggga | cggcatctga  | ggacttgggc  | 20820 |
| cttcattgca  | gcatcttcag  | acaggcgggg  | aggaggagg  | aggtcttggc  | cttggacggc  | 20880 |
| tgttcttctc  | cagtggcatc  | caggaactgc  | tgcatataac | tggaggagcc  | aagcagcatg  | 20940 |
| tggcctgtgg  | cctgcatgct  | gaagagggcc  | cagcggagca | tttcccctggg | agacagcaag  | 21000 |
| gcactcaggt  | taaactctcc  | ccatgctatc  | tccccaaatg | tcttctccat  | ttttctatgc  | 21060 |
| tggcctaaag  | cagttggctt  | caagttagac  | ttctttcttt | gtttctactt  | cttttatctt  | 21120 |
| tgagatagaa  | tcttaacact  | ttatctcagg  | ttagctagaa | attcatttat  | gtagctcagt  | 21180 |
| ctggctttga  | actcacagaa  | atctcctgcc  | tcaatctcct | gatgctgttg  | cagttatggg  | 21240 |
| ccaccacacc  | taactttttt  | tggtttggtt  | tggttttgat | ttggctcttt  | ttgaaacaga  | 21300 |
| atctggagat  | cctcctgtct  | tgtcctccca  | agtgctaggt | atacagacat  | gtcccaccat  | 21360 |
| actgggctca  | agctagcttt  | tctccttagg  | aagatttaag | tgtcactaaa  | gtaaaatgac  | 21420 |
| aaaaatgctt  | ccaagtacag  | acaggaactg  | ggaaccaggc | tcatagctag  | ccatccccta  | 21480 |
| cacatagttc  | tgctctact   | cttgtgacaa  | cttttctgga | acccttggct  | ttttcccatg  | 21540 |
| cttaacttga  | gttctcaaaa  | caaagctttt  | tattttcttg | taatgatatt  | ttgtttcttt  | 21600 |
| cttttctctt  | ctatgggtgct | ggggatggaa  | cccagggctt | tatttgtgca  | taagcagctg  | 21660 |
| acctgccatg  | gagctatgtc  | cccagcccca  | tatatttttt | ttttcaagac  | agggtttctc  | 21720 |
| tgtgtagctt  | tggagcctat  | cctggcactc  | actctggaga | ctaggctggc  | ctcaaaactca | 21780 |
| cagagatccg  | cctgcctctg  | cctcccaggt  | gctgggatta | aaggcgtgtg  | ccaccaacgc  | 21840 |

|            |            |             |            |            |            |       |
|------------|------------|-------------|------------|------------|------------|-------|
| tcggcaccca | gccccatatt | ttttaaacta  | ctctggacca | gccagattaa | tttacataac | 21900 |
| acatgtctac | cctttgtaac | actgcttctt  | agactttata | gtcttcccag | gccagtcttc | 21960 |
| agaatgctgg | ccacaaggct | cccatgcctg  | atatcatatt | ctaagcatag | aacttggacc | 22020 |
| agacagggct | gaacactgat | ccagagtggg  | ttgtttatat | ctaaaatatt | taaaatatat | 22080 |
| tttaaatat  | tataaagatg | ggtgatgtaa  | ctaatttagt | gcttgccttt | catgaacaaa | 22140 |
| gccctgggtt | tgatccccag | caccgcaata  | accagagtg  | gtaatatagg | actgtaaacc | 22200 |
| taggatccag | cactgtggag | gtagaagcag  | gtggatccca | agttcaaagt | catccttggc | 22260 |
| tacatagcaa | gtgtgagacc | agcctgagat  | acatgagacc | ctgccaaaaa | aaaaaaaaaa | 22320 |
| aagctttaac | tgttctgggt | ctgagctcca  | gcagccagaa | gctttgtgac | ttgtaaaatg | 22380 |
| ggtaatgagt | ttgaaactaa | tgtgaagcac  | ttagcatttg | gtctgatgga | cagaaaatgg | 22440 |
| gacatgcagc | caagagcagc | tggctgaatg  | caacttctcc | cacagctatt | gacaagggct | 22500 |
| cggcaggggt | cactaggagt | tgctggcttt  | aagaacaata | aggaagagaa | aacacaagaa | 22560 |
| agagaaatac | tgccaggccg | cgggtggcaca | tgcttttaat | cccagcactc | aggaagtaga | 22620 |
| gacaggcaaa | tctctgtgag | ttcgaggcca  | gcctagtctt | cagagcaagt | tccaggacag | 22680 |
| ctacggttac | atagtgatac | cctgtctcaa  | aaaagcatat | atatatatat | atatatatat | 22740 |
| atatatatat | atatattgaa | tttagtggcc  | tgaggcaatg | gctcagtggg | taaagtgctt | 22800 |
| gccatatggc | catgaggccc | tgaaagccca  | tgtaaaactg | gggatggctg | cctgtatctg | 22860 |
| tgaccccagt | actcctctca | tggtagagaca | gagagacaag | agactcctct | gaagctttca | 22920 |
| ggccagcaag | cctggcccag | acaacagaca  | aacagcaaag | accctgcttg | aaacacagtg | 22980 |
| gaagatgaga | ccagcacctt | aggctgtcct  | ctgacttcga | aatgcacgct | gtggtacatg | 23040 |
| ggtgcccaca | ttcacacaca | tatagagata  | aagactggct | gggcagtggg | gacacacgcc | 23100 |
| tttaatgcca | gcacccttga | ggcagaggca  | gtagatctc  | tgagtccaag | gccagcctgg | 23160 |
| tctacagagt | gagtttcaag | acagccaggg  | caacacagag | aaataagaaa | agagaaaaaa | 23220 |
| aaaagatata | aagactgaaa | ctgaaaatat  | aatatattag | ggctagaagt | atagcttaat | 23280 |
| ggcatgggtc | ttgtctagca | tgtatgaagg  | tctggttta  | atcccagct  | ttgaagcatg | 23340 |
| tgtgtgtggt | tgtttctttt | tgtggtactg  | gggaactgga | cacaaggcct | taggcaagtg | 23400 |
| ctctgccatt | gaactacagc | ctcagctttc  | ttttcttttt | taaaaatggt | tatttatttt | 23460 |
| atgtatatga | gtactctatc | tgcattgatg  | actttatgct | agaagagggc | gtgagatccc | 23520 |
| actatagatg | gttgtgagct | accatgtggg  | tgctgggaat | tgaactcagg | acctcaggaa | 23580 |
| cagcagccag | tgctcttaac | cgttgagcca  | tctctccagc | cccctcagct | ttctttttac | 23640 |
| ccccccacac | acaatatctc | tctaagttgc  | ccagtttagc | cttgaactta | ctctgtagcc | 23700 |
| taggcaagct | tctaatttgc | catcctcctg  | tctcaatttc | ctaggcacct | gggagtacaa | 23760 |

|             |             |            |             |             |            |       |
|-------------|-------------|------------|-------------|-------------|------------|-------|
| ggccatgtat  | agctttatat  | atatgtttcg | tgcagtgcc   | tcaaagttat  | ttctcaaatt | 23820 |
| agagaactga  | gttttgactc  | tagccagcca | gtcttaaaaa  | ggaatgaaaa  | taaggcctat | 23880 |
| tctacaaatg  | aatgaacctt  | gaaaacagaa | ttcttgtggg  | gaaagaatca  | tgatcccatt | 23940 |
| tctatgaggt  | ctctaggata  | gatcaatgga | gcaacagaaa  | gtagagtaaa  | ggtgagcagg | 24000 |
| gtctcgggag  | agggctgaga  | accattat   | actgagtaca  | gcttctgctg  | cctggtgcaa | 24060 |
| aggttctgga  | aaccaaggca  | atgcttgcac | aacatgatta  | gttacttcat  | gctagacact | 24120 |
| tcaagcggcc  | acagttgaaa  | aatggtgaat | gtgcagat    | tagcacgggt  | gttttttctt | 24180 |
| gaaggctctca | ttgtgtagct  | ctagctagaa | tttggaaactt | gaaatgtaga  | ccaggctagc | 24240 |
| ctaaaattct  | caggagatct  | acctgcctct | gcctcctgaa  | tgctggctgg  | gattaagggg | 24300 |
| gtgagctacc  | acacctgacc  | ccttagtaca | tttttttttt  | taaatacacag | taacaccact | 24360 |
| aagtcactca  | gctaaccaca  | gtttgacatc | agtttttatt  | ttctctaagt  | ttttattttt | 24420 |
| gttggtggtt  | tattttggtt  | ttcaagacag | ggtttctctg  | tgtaacagcc  | ctagctaccc | 24480 |
| tggaacttgg  | tctgtaaacc  | agactggcct | tgaactcaca  | gagactcacc  | tgctcagcc  | 24540 |
| tcccagagtgc | tgggaccaaa  | gatatgactc | ctggcctttt  | tattttcttt  | ccatgtgtgg | 24600 |
| gaggtagggg  | ttatgcacct  | gagtgcagtg | cccacagtgg  | tcagaagagg  | gcaacatata | 24660 |
| tcctagagtt  | gcagttacat  | gtggttgtga | gctggctgag  | gttgggtgccg | ggaactggac | 24720 |
| ctaggtcctc  | gggctgagtg  | gttccctttt | tctgtttttg  | ttttcaatac  | agggtctgat | 24780 |
| ctggcccagg  | ctgtccttga  | actcctgatt | ctacacctcc  | aaagtactgg  | aattatagtt | 24840 |
| acattttcac  | ttacaaaaat  | attagctgtg | gaaatagctc  | aggatatgag  | tatgtgctta | 24900 |
| gcatgcgtgc  | tgccctgggt  | cctatcccca | gcacacaaaa  | gaaagcacat  | gactgtcatt | 24960 |
| ctttgttagc  | ccccagtgcc  | aaccaggct  | ttgagagagt  | tcagctttgg  | gtagacacaa | 25020 |
| aggacctctg  | gttagctagt  | ctcccacct  | gctgtcccaa  | tctactcact  | tcacgacgcg | 25080 |
| cttgccccgg  | tagcagtgca  | ggtcatagga | aagtgtgtat  | gtgtcataga  | gggtcgcctt | 25140 |
| cacgttcagg  | cagccgatga  | agtccctggg | gttcagcttg  | tataggtcaa  | aggttacccg | 25200 |
| ggccacatca  | atcttctttg  | ttggcttctg | ggaaagggat  | agctgtggtc  | tcgtcttgcg | 25260 |
| ctgcaagaca  | agtccatggt  | agctcgcctc | tgggactcct  | tccacgccct  | cgacactcac | 25320 |
| ccctgctgga  | ggagactgtc  | acctgttctg | atgggggctt  | ccacttctgc  | cccttctgca | 25380 |
| ggacatgaa   | cacagtatct  | cttgccaggg | cttggaaagta | ttcttctgtc  | tcaacaatcg | 25440 |
| tgccgtcttc  | ctccagcacg  | agggagaagg | gcttgtcttt  | aagtttcaag  | atatcctggg | 25500 |
| cctggaaaag  | aaggttgggtg | acatttctgc | catccctatg  | gagccacaga  | gttgaggagc | 25560 |
| aaaggccccg  | agtaaagcac  | ttcagctgcc | agagagagag  | caagtgagct  | gccatccatc | 25620 |

|            |             |             |            |             |             |       |
|------------|-------------|-------------|------------|-------------|-------------|-------|
| cgtgcatgg  | actgactgtc  | actgtggggg  | cccactcaag | ggctgtgtct  | cagtacttcc  | 25680 |
| tactccaag  | aaggagtgta  | gtctaataga  | atgggagtca | tatgtgaggt  | cttttttatt  | 25740 |
| gagaaataaa | ttacatacca  | tgctgggcaa  | tattaggagt | catatcgaag  | gccttgggca  | 25800 |
| agctaggcaa | actgcagcat  | tgaactatat  | ccccagcctt | ctttgtactt  | tttgtttgga  | 25860 |
| gacaggatct | tactaagttg  | tttaggttgg  | cctggaactc | actgtgtagt  | ataggtaggc  | 25920 |
| ctcagccttc | tatttagatc  | ttottgactc  | agcctcctaa | gtaacttgga  | ttacaggcct  | 25980 |
| acactaccag | gcccagctaa  | actttatatt  | gttgggtgtg | gttttttggt  | tcttttgcta  | 26040 |
| tgtagccgtg | gctggccttg  | aactcacaga  | gatccacctg | cctctgtctc  | ccaagtgctg  | 26100 |
| gggttaaagg | cacgttggtt  | tggaataatc  | ttttggtaca | ctgtgaagtt  | gtgtctttgt  | 26160 |
| caaggcgctt | tctgactggg  | ttaataaaaag | aactgactgg | ccagtagcta  | ggcaggaggt  | 26220 |
| ataggcagga | aagcaagaca  | cagaggactc  | tgtgaagaag | ggcagagtct  | tgggagtcat  | 26280 |
| gagcaaatgc | agaggggaagc | aagatgaaag  | aaggtaccac | tatgatgcag  | agggtagata  | 26340 |
| gtaaaaggat | taatttaagt  | catatgagct  | agctaaacac | aactctaagc  | tatcagccaa  | 26400 |
| gcatttataa | ctaataatga  | gtctttgtgt  | agttatttga | gaactggcta  | tcgggataga  | 26460 |
| aaagtctgtc | tatagtgtgc  | atcaccatac  | ctggccacta | ttttaaattt  | ttatttttaa  | 26520 |
| ttatgcgtat | atgtatgtat  | gtgggtcccc  | tggagcaagt | gattgtgagc  | tgcccagtgt  | 26580 |
| gagagctggg | aactgaacct  | ctgtcctctg  | aaagtgcttt | taacgactga  | gccaccactc  | 26640 |
| tagccccaac | aactcatttg  | taatcttggt  | cctgccaaag | ctacatggca  | tgaactgaag  | 26700 |
| aaacaggtca | ttcaaaactg  | agggacagga  | aataaaataa | ctggcttgcc  | atcttttaaaa | 26760 |
| gccagctaga | agaatcagca  | ggtaagggtt  | cttgcagtgc | aaactttagc  | atgtgagttc  | 26820 |
| aatacctgga | gcccacagta  | gaaggagaga  | aatgactccc | aatggttgcc  | ctgtgacctc  | 26880 |
| catgtgtacc | ctgtggcatg  | ggcatgccag  | tgtcacaca  | cacgcttcat  | agacttacag  | 26940 |
| taataatttt | aaatataaaa  | taaaactgtc  | tggatttgca | ggacaatcag  | cagtgtctca  | 27000 |
| acagagtctc | aagataagct  | tggggggggt  | cttgttatgt | agccctagtt  | gggcaggaac  | 27060 |
| ccctatatag | agaccaggct  | gacctcaaac  | atgtggctct | cttgcttctt  | catgcatcac  | 27120 |
| cacactcagc | cttagtttta  | atctcttttg  | aggcataccc | agcgtatcct  | ggaactcaat  | 27180 |
| tatgtagccc | aggctagcct  | caaacctgag  | atcttccata | tctggctctcc | cagatacgag  | 27240 |
| ccaccatgcc | tggctcattt  | ctccacgtgt  | aaatatgggg | aaggggaatg  | aatggccctt  | 27300 |
| tcagcaagaa | aataaccacc  | caccacgggt  | tgggtgtaaa | gacggtagtg  | cactgccctc  | 27360 |
| cttctgtcac | ttgaccatgt  | cacttatcac  | acacacagct | ctccaggcgg  | aaatgccaac  | 27420 |
| cctccagtgc | caacaccttt  | ctccgcttaa  | gaccatgcca | ctcatgcgca  | cagacttcag  | 27480 |
| ggctctccag | aaaccgaagc  | agccggcagg  | ctcaactctc | agccaaggcc  | tggagagagc  | 27540 |

|             |            |            |            |             |             |       |
|-------------|------------|------------|------------|-------------|-------------|-------|
| ctatgcaggg  | taccggcaga | tcccttacct | tgcccaggag | gtcctccagg  | ctgtgagcca  | 27600 |
| tgatgccttt  | gcgaaccttc | cgatctgccg | tgctaactcg | acagggcctc  | gccctgggga  | 27660 |
| cttccccggct | gggcttagac | accagctggt | gggtcaccac | tgcagtgctc  | actgctacat  | 27720 |
| gcctggggac  | aacagtttgt | acagcagatg | acctgcctgc | ggctaccagg  | tctgcccattg | 27780 |
| cctgcctgct  | tgctgagttc | aggtgtgacc | tttcttcca  | accaatcatg  | gctgcttcag  | 27840 |
| gcggtcttca  | caaagtccat | cagaagacac | agctccgatt | tggaggggca  | gggaaatcag  | 27900 |
| cgggaatctt  | gcttaaatca | gactcacttc | agtgcctctg | agtggagccc  | aaggactgct  | 27960 |
| aacaagtccc  | caagctgtgt | cagtgtggct | ggttcttggg | ccagccacat  | tctcctgtgg  | 28020 |
| atggcttctg  | cttttgtggc | cttgttcacc | ttgcctaaga | ggcaggggta  | aatggagctg  | 28080 |
| gtgtgtgtat  | atatgtgggg | tgtgtgtgtg | tgtgtgtgtg | tgtgtgtgtg  | tgtgtgtgtg  | 28140 |
| tgtgtgtgtg  | tgtgtaaate | ggcctgtaga | atatgtgggg | actctgaggt  | acacagggta  | 28200 |
| gaaagaaagg  | agcagagaga | atltgggtct | tggtggaat  | tccaagtttc  | tctctgttac  | 28260 |
| ggatttgcta  | ggtgacagca | taccagcct  | gtgactcagt | ttcctcatct  | gttgacttgg  | 28320 |
| catagttgcc  | accacttccc | agagaggagt | gaggctcctg | ggagatcagg  | aacaaaggca  | 28380 |
| cctggtgccc  | agcctgacct | tttctactcc | agatgtgatg | ggaactgtgg  | cagtgacaga  | 28440 |
| gagtaagatg  | gggactgtct | agactgcaag | atcttgggtg | ctaccctagg  | cctcctgaat  | 28500 |
| cagatctgtg  | ggggtttatt | gtaagatltt | gtctgttttg | ttttaatggg  | ggtcttgctt  | 28560 |
| atltgtttgt  | tttttgggat | agcatctcca | tatatagccc | tggtttactg  | gaactaattt  | 28620 |
| cctcatctct  | gtctctgtct | ctgtgtctgt | gtctgtctct | ctctctctct  | ctggacctgg  | 28680 |
| acctatgcag  | accagactca | aactcaccia | gatoctcatg | ccactgctcc  | ccaagagcca  | 28740 |
| ggattcaaaa  | catatgccac | catgcctggc | catatcagct | agaccccaca  | tgactttttt  | 28800 |
| tgtcttttaa  | aatgggatgc | ctatgtagcc | ctgactgacc | tgggacttgc  | tgtgcccact  | 28860 |
| acaggctggc  | ctcaaactca | gatctgcctg | cgtctgcctc | ctgagtgtctg | ggattgaaag  | 28920 |
| cgtgtaccat  | cacatccagc | ccctacatgg | ttttataacc | tattaaagtt  | ttcaaagttc  | 28980 |
| taatagatgg  | ctccccagct | ttccccctcc | ttcccatacc | cagctctcct  | tacctggaca  | 29040 |
| gtgacttagg  | gtacaggagg | ctgagagact | tcatggcata | gtccatcctt  | gtcagctgga  | 29100 |
| ttgtgttggg  | cctggatcgg | aggcagtaac | ctatctgggt | agagtgggaa  | gggagggagg  | 29160 |
| ggtccctctc  | tttctttctt | tgactcagtg | gatcccagcc | cccacacggc  | aaccctctgc  | 29220 |
| cccagctctct | cctcctacct | ccaatttccc | tgaatccaca | ccaactacac  | tgagtccagc  | 29280 |
| tctaccatcc  | ccaccatctc | cacagcccc  | gaacaactca | ctccatgttt  | ctctgcccc   | 29340 |
| agctctgggt  | acactgagct | gaggaacca  | agtcaaggct | gaagaggccc  | tactgattt   | 29400 |

|             |            |             |             |            |            |       |
|-------------|------------|-------------|-------------|------------|------------|-------|
| gtccctgtcc  | ctgggggag  | agtccacatt  | atgctggcag  | gaggtgagtc | ataccacctc | 29460 |
| atgctgtgag  | agacttgaaa | gtcacctatt  | gtccagaaac  | tccacaggca | gtcagacctt | 29520 |
| ggagagcctg  | ctctaaccat | gggcccctga  | gcaataaagt  | cctcctgagg | cttagaactg | 29580 |
| gctaagagaa  | ctttctgtga | tcttaaagac  | tgtctaggct  | tgtgttcacc | aataccttag | 29640 |
| ctgttaccac  | tgagcccttg | gcaccataac  | taatgtgaca  | aaggagctga | caccgaactt | 29700 |
| ctattgaggc  | ttaactaatt | tagttaggta  | actactgtgg  | tttgtgacgc | caggtacccc | 29760 |
| actggacatt  | acagttgtag | tggagtaatc  | ctgggctcat  | gtgccccctg | cctttcctcc | 29820 |
| tatattgctg  | ttctctgggt | cttgccctgct | gagctgcaag  | tctctgcaca | ggcagtctct | 29880 |
| tctacctgca  | atgcttgtct | caaacctcaga | gctcaacata  | agtcacctag | aagccccagc | 29940 |
| tcctggctgc  | caactcagga | aagccttttc  | tggtgccctc  | ttgcctggta | ccagattgat | 30000 |
| ccctgtgccc  | tgcccttcca | tgtgaaagac  | ccctctccct  | tagccctttc | tttctcaagt | 30060 |
| ttgtctctct  | ttcctcctgt | cgggcgcttc  | cccgatcccc  | acccccggtg | gcctttcccc | 30120 |
| gccccggccc  | agaacaagca | ccgggtgggg  | ccggccccgag | aacaagcacc | gggtggggcc | 30180 |
| ggccccgagaa | tgagcaccag | gtggggccagc | ccgagaacga  | gcaccgggtg | ggctggcacg | 30240 |
| agggcgagca  | ccaggtgggt | cagcacgagg  | acaacaccg   | agtgagccgg | cctggagctc | 30300 |
| tgcccctgag  | cccccgcccc | gcccgaagag  | aaacactccg  | tcccagggtc | tccgccccca | 30360 |
| aggtcagcca  | tcaggaaaag | ggggggaatt  | gagtctgctg  | taccagacac | cagaccttga | 30420 |
| gaatatgctg  | atctggaatg | gctctgtgtc  | tcatttgaac  | catccaatgg | aaatgattct | 30480 |
| gtatttcgcc  | tcatttgaaa | gactctgtgt  | ttcacctcat  | ttgaataact | ctgtactttg | 30540 |
| cctcatttga  | ataaccctgt | atagcgctc   | atatacattg  | accaatggga | atagctctgt | 30600 |
| ataatgcctc  | attagaatta | tccaatagaa  | tccttgctcc  | tagcttgccg | cttttttcc  | 30660 |
| atataaggac  | cccttttccc | ttggctcggg  | gcgcttagcc  | acacagaagc | taagtcgccc | 30720 |
| caggtacctg  | cgtctccaat | aaagcctctt  | gtttttacat  | ccagttcgtg | gcctcgctga | 30780 |
| ttcctgggtg  | tgtgggtctc | cctctacgaa  | agtgcctctt  | cggggtcttt | catttggggg | 30840 |
| ctcgtccggg  | attgagacct | gcccaggac   | caccgacca   | cgtctgggag | gtaagtgttg | 30900 |
| tgcggatccg  | ctgttttgtc | ttgtctggtc  | tgagtctgtc  | ttgtgaattg | cgcttgcgtt | 30960 |
| tgtagtatac  | agctgtgtac | atgtgtaggc  | ggatccgagg  | agggactgac | gggtccgaac | 31020 |
| tcccgaccgc  | ggctccagga | gacgtcctgg  | tagcgtttga  | agccctcagg | aagagggatt | 31080 |
| tgtattttga  | acttgggaag | ccctcagggt  | gagagatttg  | tactttgaac | ttagatctat | 31140 |
| gactggacat  | tttcccagtc | tctttggaga  | aggccctcgg  | cttgagggat | ttgcaatctt | 31200 |
| tactggggac  | gaggaaggag | ggcccccttc  | ctcgactctc  | tctcaattcc | ttctgtcgac | 31260 |
| tctctgtcga  | aaccgcgctg | cgaaagtctg  | ttctgtgtta  | ttcgggtctt | gtctttagc  | 31320 |

|            |             |             |             |             |            |       |
|------------|-------------|-------------|-------------|-------------|------------|-------|
| tgtcatttgt | gccctcctaa  | gcctagaaac  | tatggggcaa  | actgtcacca  | ctcctttgtc | 31380 |
| cctaactctc | tcccactgga  | aagatgtaca  | ggaatatgct  | cataaccaat  | ctgttaatgt | 31440 |
| gcgtaaacgc | aatggatta   | ctctttgttc  | ttcagaatgg  | ccgacctttg  | atgtaggctg | 31500 |
| gccgcgagat | ggtaccttta  | acccccagac  | tatattccag  | ataaaagaga  | agattatgga | 31560 |
| tcctggacca | cacgggcatac | ccgatcaagt  | ggcttatatac | gtcacttggg  | aggctttggt | 31620 |
| tcaggacccc | cctccctggg  | tacgtccttt  | cttacaatccc | aagggccct   | ctctccttcc | 31680 |
| cccctctaac | cgctccaacc  | gaccattcc   | ttcggcccct  | acacctcca   | ctcctttgat | 31740 |
| tcctcccaac | cccccttccc  | attccaacct  | ttaccctacc  | gtgatgaaag  | acactaaggc | 31800 |
| taaagaaaag | aagacaccta  | aggtactccc  | tccgggagaa  | gaccagttgg  | ttgatctatt | 31860 |
| aacggaggag | ccccgcctat  | atccgccact  | gccgccccca  | ccagaggcag  | aagcggactc | 31920 |
| cgccgctgcc | ttggcggaag  | cggcccctga  | cccttcacca  | atggcttatac | gactaagagg | 31980 |
| tcgtagggag | cagcccgttc  | cagattcaac  | caactctgcc  | ctccgaactg  | ggctgaacgg | 32040 |
| ccaacctcag | tattggccat  | tctcagcatac | ggacctctat  | aactggaaaa  | ataataatcc | 32100 |
| ttctttttct | gcagacccccg | tgaggctgac  | atctctcata  | gagtcggtac  | tcacgactca | 32160 |
| ccaaccacc  | tgggatgatt  | gtcagcagct  | tttgcaggtc  | cttttaacct  | cggaagagaa | 32220 |
| acagcgcgtg | ctactagaag  | cacgaaaaaa  | tgtcccagga  | gtaaacgggc  | agcccacca  | 32280 |
| gctaccaat  | gaaattgatg  | cggcttgccc  | tcttgaaaga  | cctgaatggg  | attttaccac | 32340 |
| cgaagcaggt | aggaccacc   | tgcgtctcta  | tcgccagttg  | ctggtagcgg  | gactccgggg | 32400 |
| ggcaggacgc | agaccacta   | atctggcca   | ggtgaagcag  | ataatacagg  | gtgcggagga | 32460 |
| atcacctgcc | gcttttctag  | agagattgaa  | agaagcgtac  | aggatgtata  | ctccctataa | 32520 |
| tccggaagat | ccaggtcagg  | ccaccaacgt  | ttctatgtcc  | tttatttggc  | aatcagcccc | 32580 |
| ggacataaga | aacaagcttc  | aaaggctaga  | aatctacag   | ggatatacac  | tccaagattt | 32640 |
| gttgaaggaa | gcagaacgta  | tttttaataa  | gagggaaaca  | cagacagaaa  | gagaagaacg | 32700 |
| ttggaggaag | gaaactcagg  | agagagagga  | aagactaaga  | caggaagctg  | aggaaaaaga | 32760 |
| ggttgcgaga | gaccgtaagc  | ggaataaaga  | aatgagcagg  | ttattggcca  | cagtagtgac | 32820 |
| aggccagaga | cagaatagac  | agagggatga  | cagaaggggg  | ccccacctgg  | acagggacca | 32880 |
| atgtgcttac | tgtaaagaaa  | aaggacattg  | ggcaagagaa  | tgccctaaga  | acccccgggc | 32940 |
| caagcttcca | ccgccaaggg  | tttctgacct  | cctgaaccta  | gaagattaga  | ggagtcgggg | 33000 |
| ccaggagccc | ccccctgagc  | ccaggataac  | actgcaagtc  | ggggggcatc  | cggtcacctt | 33060 |
| cctagtcgat | acaggggcac  | aacattccgt  | tctgaatcgg  | tcaccgggac  | ccctgagtca | 33120 |
| caggactgca | tgggtacagg  | gagctacagg  | cggaaagcag  | taccattgga  | ctacaaatcg | 33180 |

|            |            |            |            |            |             |       |
|------------|------------|------------|------------|------------|-------------|-------|
| gcagctccag | ctcgcgaccg | ataaggttat | gcattctttc | ctccatgtgc | cagactgccc  | 33240 |
| ctaccctta  | ctaggacggg | acctattgac | caaattaa   | gctcaaatac | actttgagag  | 33300 |
| gtcagaagtc | aaagtcacag | ggccagaggg | aattcccctt | accatcttga | caatgtccat  | 33360 |
| agaagatgaa | tatagactcc | atgaaaagag | gactaattcg | aacaatcagg | aaacccttga  | 33420 |
| tcactggctt | gcggaatttc | cccaagcctg | ggctgaaaca | ggaggaatgg | gccttgccat  | 33480 |
| taaccaggcc | ccaattatag | taaccttaa  | agctgccatc | cttcctgcat | ccgtcagaca  | 33540 |
| gtatccaatg | cctaaagaag | cccgcgaagg | aattcggcca | catattaa   | ggttacttga  | 33600 |
| acaagggatt | ctggtgcctt | gtaaactctc | ttggaataca | cccttgctac | ccgttaggaa  | 33660 |
| gccgggaact | aatgactacc | ggccagtaca | ggacctgaga | gaagtcaata | aaaggataga  | 33720 |
| ggacatacac | cctactgtcc | ccaacctta  | caatttgctg | agtggattgc | cacctaaacta | 33780 |
| tacctggtac | acagtcttag | atcttaaaga | cgctttcttc | tgctccgcc  | tgcatcccac  | 33840 |
| cagccagcct | atatttgctt | ttgaatggca | ggacgcggcc | cttggaatct | ctgggcagct  | 33900 |
| gacttggact | aggctacctc | aagggttta  | gaacagccct | accctttttg | atgaagcttt  | 33960 |
| acatcaggac | ctggcagaat | tccgggttag | gtaccccgct | ctaactctct | tacaatatgt  | 34020 |
| agatgacatt | ctcctggcag | ccaaaacca  | agggaaatgc | aaggaaggca | ctcaagccct  | 34080 |
| cctccagact | cttgggagcc | tagggtaccg | ggcatccgcc | aagaaggccc | agatatgtca  | 34140 |
| gaaacaggtg | acctatntag | gatacaagat | aaaggatgga | cgtcgatggc | taacggaagc  | 34200 |
| ccgtatgcga | gccatcttag | acattcccac | cccacaaat  | ccccccaac  | tgagagaatt  | 34260 |
| cttgggaacg | gcaggcttct | gocgcctatg | gatccctggg | tttgccgaaa | tgccggctcc  | 34320 |
| cctctacccc | ctcactcggc | caggggttgc | ttttaaattg | gaagagcccc | aaaagaaagc  | 34380 |
| cttcaccgac | atcaaaaagg | ctctccttga | atcaccagcc | ctgggtctac | cggacttagc  | 34440 |
| taagccattt | gaacttttta | tagatgagaa | ggagggtat  | gctaaggag  | tcctcaccca  | 34500 |
| aaatctgggg | ccttgagaa  | ggcccactgc | atacctctcc | aagaaattgg | atcctgtggc  | 34560 |
| atcgggatgg | ccacctgcc  | ttogaatgat | tgctgctata | gccctgctgg | taaaagattc  | 34620 |
| tcacaagcta | accttggggc | agcctttgac | catacatgcc | cctcatgcag | tagaggcagt  | 34680 |
| catcagacag | cctccagata | gatggcttac | taatgcccga | atgactcatt | accagactat  | 34740 |
| gctgttagac | aaagaccggg | tccacttcgg | gcctttggtg | actctgaacc | cagccaccct  | 34800 |
| gctccccctc | cctggggagc | ccgaggctca | tgattgctta | caggtattgg | ccgaggccca  | 34860 |
| tggagcgaga | tccgacctga | ctgaccagcc | tctacctagc | ccggaccaca | tctggttcac  | 34920 |
| ggatggaagc | agctttttgc | atcaaggaga | acgaaaggcg | ggcgcggcag | tcaccacaga  | 34980 |
| gaatcaggtc | gtctggggcc | aggcactccc | ccctggaact | tccgcacaga | gggcagaact  | 35040 |
| catagcactc | acgcaggctc | taaaattggc | agaaggtaag | aggctcaccg | tgtatacaga  | 35100 |

|            |            |            |             |            |            |       |
|------------|------------|------------|-------------|------------|------------|-------|
| cagtcgttat | gcctttgcca | ctgcccata  | acatggagaa  | atttacagac | ggagggggct | 35160 |
| gcttacctcc | gaagggaaag | acattaaaaa | taaggaggaa  | atcctcgctc | tcttaagggc | 35220 |
| tcttcatctg | cccgctgco  | taagtatcat | acattgccct  | ggacaccaaa | aaggggattc | 35280 |
| tttcgaagca | aggggcaatc | gaagggcaga | cttggctgcc  | cgagaggcgg | ccctgaccac | 35340 |
| agacaccact | aacctcctgg | ctctagagcc | caccaacgac  | catcccctcc | cctcatggga | 35400 |
| ctatgaacaa | agagacatcc | aaacctaga  | gaaattggga  | gccgcaaagg | aaccaaacgg | 35460 |
| ggattggact | tatgaaggaa | agactgtcat | cccctaccgg  | gtaaccaagt | acctagtjac | 35520 |
| atTTTTacat | aagatgacac | atctgagctc | caagaagatg  | cgggagctcc | tcgaacgaga | 35580 |
| agaggaattc | aatttccttt | tggggaagaa | cgatattcta  | aaacaggtaa | ctgagcaatg | 35640 |
| tgatgcgtgc | gcccgagtca | acgcatccag | actgaagctt  | cctcccggga | accgggtcag | 35700 |
| aggctaccgg | cccggaacac | attgggagat | agatttcact  | gagattaaac | caggaaaata | 35760 |
| tggatacaag | tatctattaa | tttttgtaga | caccttttca  | ggatgggttg | aagccttccc | 35820 |
| tactaaacat | gaaacagcca | agatcgttac | taagaaattg  | cttgaagaaa | tctttccccg | 35880 |
| ttatgggatg | cctcaggtat | tgggaacaga | caatgggccc  | gccttcgtct | cccaggtaag | 35940 |
| tcagtcagtg | gccaccttat | tggggattga | ttggaaatta  | cattgtgctt | atagacccca | 36000 |
| aagttcagga | caggtagaaa | ggatgaatag | aacaatcaag  | gagactttaa | caaaattgtc | 36060 |
| gcttgcaact | ggcactagag | actgggtcct | cctactcccc  | ctagcactct | accgcgctcg | 36120 |
| taatacccct | ggaccacatg | ggctcacacc | ctttgagatc  | ctgtatggag | tacctactcc | 36180 |
| tatcattaac | tttcttgatc | aagatgtctc | agatTTTgct  | aactcccctt | ctctccaagc | 36240 |
| tcatttacag | gccctccaac | tagtacaacg | ggaggtctgg  | aaacccttg  | ctcaagctta | 36300 |
| taaagaccag | agggaccatc | ccaccatccc | ccattcctac  | cagatcgggg | acactgtttg | 36360 |
| ggtccggcgt | caccaggcca | agaaccttga | accccgctgg  | aagggaccct | acatcgTTTT | 36420 |
| gcttaccact | cccaccgcac | tcaaggtaga | cggcattgca  | gcttggatac | atgcttcaca | 36480 |
| tgtaaagcca | gccaaccca  | ccgattcagc | cactgcatca  | gaatggaccg | cacaccgcac | 36540 |
| tcaaaatcct | ttaaagataa | gactctctcg | tacaccctcc  | tgTTgattgg | ttgtctgTTT | 36600 |
| accccccatg | tagcaactaa | ccccacaggg | gTTtataata  | tcacctggaa | aatagccaat | 36660 |
| ctagggaccg | gggaaatagc | caacctcagc | acttatatag  | ggactctaca | tgatgggttc | 36720 |
| cctcctctct | atgtcgacct | atgtgactta | gtagggctctg | attgggatcc | ctctgaccag | 36780 |
| gaaccattcc | cagggTaccg | atgccaccac | cctgggggaa  | ggataggaac | aagaagcaag | 36840 |
| gatttttatg | tttgccccgg | ccataaacca | actcatggct  | gcggggggcc | gcaggaaggg | 36900 |
| tactgtgcaa | gatggggatg | tgaaacca   | ggggaggctt  | actggaaacc | ctcttcctct | 36960 |

|             |             |             |            |             |             |       |
|-------------|-------------|-------------|------------|-------------|-------------|-------|
| tgggatttca  | tcactctcaa  | acggagggag  | atcccagggt | acgcagggaa  | aggaccatgg  | 37020 |
| agatgtgggc  | aaagagcctg  | cggaccttgt  | tatgatagtg | ccggaggggg  | aggttttcaa  | 37080 |
| ggcgccaccc  | ccggaggaaa  | atgcaaccct  | ctcatcctaa | ggttcacaga  | tgctggaaaa  | 37140 |
| agaactactt  | gggatagtcc  | taaggtctgg  | ggactcaggc | tgccaccgagc | agggaaagat  | 37200 |
| ccggtgactt  | tattctccct  | gtacagacaa  | attactcccc | taagccaaca  | atcagttggg  | 37260 |
| ccaaacatag  | taatagcggg  | ccagagatcc  | ccaaccatt  | ttcaagtccc  | taaacccccct | 37320 |
| accgttctta  | aagctatcac  | tcctacacca  | ggtgctgtca | ccttctcccc  | caccccagat  | 37380 |
| gccctaaaca  | tcgagataac  | cagagaccct  | ccaggtacca | gagatagatt  | attacaatta  | 37440 |
| atccaaggag  | tttaccaagc  | cttaaatttt  | tcagacccca | acaagactca  | ggaatgctgg  | 37500 |
| ttatgcctag  | tttcccggcc  | cccatattat  | gaaggcgtgg | caatactggg  | caactactcc  | 37560 |
| aaccagacct  | cagcacctac  | cagttgcgga  | gctgctatgc | agcacaagct  | cacaatatct  | 37620 |
| gaggtctcag  | gaaaggggct  | atgcataggc  | aggattcctt | cctcacatca  | agaattatgt  | 37680 |
| aaccaagtag  | agccattatc  | tcaggacagc  | cgataccttg | ttgccctta   | tggaacttat  | 37740 |
| tgggcttgca  | gtactggggt  | gactccctgt  | gtctctacca | ctgttctcaa  | caccaccatt  | 37800 |
| gacttttgta  | tattgataga  | actttggccc  | aaagtcacat | accaccaacc  | tgaatatggt  | 37860 |
| tacagcgtac  | tagagaaatc  | aaccogatat  | aagagggagc | caatatcctt  | taccgtggcc  | 37920 |
| ctattattag  | gaggaataac  | aatggggggc  | atagcagccg | gcatagggac  | cggaaccggt  | 37980 |
| gccctacagg  | gaattaatca  | ttttaagctt  | ctacaacaag | ccatgcacac  | ggatatccag  | 38040 |
| gtcctagaag  | agtcagtcag  | tgcactcgag  | aaatccttaa | catcactctc  | tgaggtggtc  | 38100 |
| ctgcaaaaaca | gacgggggatt | agatttatta  | tttttacagg | aaggggggct  | atgtgctgcc  | 38160 |
| ctcaaggaag  | aatgctgctt  | ttatgcagat  | catacaggaa | tagttaggga  | tagcatggcc  | 38220 |
| aaacttaggg  | agaggctaaa  | acagaggcaa  | cagctatttg | agtctcaaca  | aggatggttc  | 38280 |
| gagggatggt  | tcgctaartc  | cccctggttg  | actaccctta | tatccacgct  | catgggacct  | 38340 |
| ctggttattc  | tatttttgat  | cctcatattt  | ggtccctgca | ttctgaacaa  | actgactcaa  | 38400 |
| ttcatcagag  | aacgactatc  | tgttgtacag  | gctttagtct | taactcaaca  | atatcatcag  | 38460 |
| ctaaagcaaa  | tagatccaga  | gtatctagag  | acctctgaat | gaaagattcc  | attcagttac  | 38520 |
| aagagaaatg  | ggggaatgaa  | agacccctct  | cccttagccc | ttcttttctc  | aagtttgtct  | 38580 |
| cctcttctctc | ctgtcggcgg  | cttccccgat  | ccccacccc  | ggtggccttt  | ccccgcccgg  | 38640 |
| cccgagaaca  | agcaccgggt  | ggggccggcc  | cgagaacaag | caccgggtgg  | ggccggcccg  | 38700 |
| agaatgagca  | ccaggtgggc  | cagcccagaga | acgagcaccg | ggtgggctgg  | cacgagggcg  | 38760 |
| agcaccaggt  | gggtcagcac  | gaggacaaac  | accgagtgag | ccggcctgga  | gctctgcccc  | 38820 |
| tgagcccccg  | ccccgcccga  | agagaaacac  | tccgtcccaa | ggtctccgcc  | cccagggtca  | 38880 |

|            |            |            |             |            |            |       |
|------------|------------|------------|-------------|------------|------------|-------|
| gccatcagga | aaaggggggg | aattgagtct | gctgtaccag  | acaccagacc | ttgagaatat | 38940 |
| gctgatctgg | aatggctctg | tgtctcattt | gaaccatcca  | atggaaatga | ttctgtattt | 39000 |
| cgctcattt  | gaaagactct | gtgtttcacc | tcatttgaat  | aactctgtac | tttgcctcat | 39060 |
| ttgaataacc | ctgtatagcg | cctcatatac | attgaccaat  | gggaatagct | ctgtataatg | 39120 |
| cctcattaga | attatccaat | agaatccttg | ctcctagctt  | gcgctttttt | tcctatataa | 39180 |
| ggaccctttt | tcccttggct | cggggcgctt | agccacacag  | aagctaagtc | gccccaggta | 39240 |
| cctgcgtctc | caataaagcc | tcttgttttt | acatccagtt  | cgtggcctcg | ctgattcctg | 39300 |
| gggtgtgtgg | tctccctcta | cgaaagtgcc | tcttcggggg  | ctttcacatg | ttcatttctg | 39360 |
| ctgcagctct | cgggtcccca | ctgtgcctgt | tttcagcccg  | tagcacaggg | accagtggtg | 39420 |
| aacaccagga | gtgggcaggc | atggagaact | gcctcctcag  | tgaaggaaaa | ccattcttcc | 39480 |
| cttctgataa | ctcgggttct | ccccggtcaa | ccttacagag  | ttagagacct | tcgtccccac | 39540 |
| ttaatgctac | ccaagcactc | ttgtttcacc | ctgtttctaa  | taccaccac  | tcacacagct | 39600 |
| ccacaaaacc | caccacacct | gctctgtggt | agccaaatac  | cccagctctt | ctcctcccct | 39660 |
| cacctcctag | cctcctggca | atactgcgtg | gccaggcaca  | gcccaggcct | cctccatttt | 39720 |
| atctctatct | cctgtgaagc | cactcccttg | gccccagccc  | cagctgggga | aaagagcaca | 39780 |
| ggagtgagtc | tgaaactctc | cctagggatt | tcaagccaga  | ctgacttcca | gaaagccccg | 39840 |
| aaaggggaag | aaggcatggt | tcgaaagctc | tagaaggaag  | aggtactgcc | caggacttgg | 39900 |
| taccaggcaa | gagggcacag | aaagcaacag | acggggcttg  | tggctctgct | tccaccctc  | 39960 |
| acaccagctg | tttgcgctca | cccagattgc | cttctttcag  | ccctggattt | tctcctgtgc | 40020 |
| atgaggaata | acgctcctgt | tgaagccagg | aatgggtggct | cagagctgta | atctcagcac | 40080 |
| ttggtagact | gaggcataaa | aagggccatg | agtttgaagc  | tagcctgggc | tatagagtta | 40140 |
| ggtcctgtct | caaaaacaaa | aatatagtca | gacggtggtg  | gcacacactt | ttgatcccag | 40200 |
| cactcggaag | gcagaggcag | gcggatctct | gtgagttcaa  | ggccagcctg | gtctccagag | 40260 |
| cgagtgccag | gataggctcc | aaagctacac | agagaaacct  | tgtctcgaaa | aaacaaaata | 40320 |
| aataaataaa | taaaaaagaa | atatcttttt | ttttttgagt  | caggcaagat | acttgagttt | 40380 |
| tattatgtct | gtctaaaagc | aggtgttagg | cctatattgta | gtgaagcgtg | gtgtgctggc | 40440 |
| gctgcaacac | cggtgaggaa | gcaggaacct | gatctcagag  | ccaagaact  | gcttgacagc | 40500 |
| aggccttcgg | cacttgccct | ctgaaatctc | ttccaccttc  | atcaggttaa | tggagtgtgc | 40560 |
| acgggcacag | tgcgggcacc | cgtgtcttgg | tagcactggt  | tgacggctcc | agcagcggtc | 40620 |
| aggtcccggg | attcttggca | catgttgtgt | gtgtcatggt  | gtgagttgta | gtgcagccat | 40680 |
| accgcaaagt | tcttcacctg | cagtggggcc | tcaggctcga  | ctgcacagtg | tacgatctcc | 40740 |

|            |             |             |             |            |             |            |       |       |
|------------|-------------|-------------|-------------|------------|-------------|------------|-------|-------|
| tccgatgact | tcttcatctt  | gttcatctgt  | gccccaaatc  | gggacttggc | caccacatgg  | 40800      |       |       |
| ttcgtcgc   | aaagatgtg   | catgaggtat  | aggagtggt   | gtggtggt   | ggcacttccg  | ggggtggc   | aaag  | 40860 |
| cagcgcccc  | ccaccttgta  | ctccccga    | agcgtgcct   | gaggtgag   | ccttcgtggc  | tgatctgtcc | 40920 |       |
| ttgttggcc  | ccagccacaa  | aaataaaa    | aggaaatatt  | cttgcttg   | cctataatgt  | tacaatccca | 40980 |       |
| tccagcactt | gggaagccaa  | ggcagga     | aggcctct    | gtggga     | tgagaccagc  | ctgggctaca | 41040 |       |
| gagtgacaac | ctgccaa     | gagaaat     | gggtgtg     | gtaatccca  | atcttgggta  | tagtgaagta | 41100 |       |
| caggactcaa | gagacagag   | caggaggatc  | atctccagtt  | caagacaagc | ccgagctata  | 41160      |       |       |
| aggcctcaaa | aacaaaaaaa  | gaatattaga  | tctatgattt  | attgctataa | acactacaac  | 41220      |       |       |
| ttaaaaaaaa | ttaaaataag  | gacagcaaga  | tgactcagtg  | aatgagggtt | tgaatttgat  | 41280      |       |       |
| ccccagtacc | cacatagtac  | aaagagagaa  | ctgactccca  | taggttgtct | ttccgtgaaa  | 41340      |       |       |
| actctccctc | ccttcctccc  | tctctctttc  | tctctctcta  | aatgaaaatg | tttacctcaa  | 41400      |       |       |
| agcctctaca | aagagcattc  | atggttacacc | tagcgttggga | gagatgtctc | agtggtaag   | 41460      |       |       |
| agcgtgact  | tctcttccag  | aggatccag   | ttctattaca  | agtaccatg  | tggcaattca  | 41520      |       |       |
| caatcattta | taactcagtt  | ccaggggatc  | tgactccctc  | ttcaggcctc | tgtgggcctt  | 41580      |       |       |
| catgtgtgtg | gtgcaaagac  | ttgcacgaag  | gcaaaacact  | gtacacataa | aataaaaaata | 41640      |       |       |
| agagacagaa | aagggaaattt | attcagtg    | tgccataccag | aaaagatgag | aggaccagtc  | 41700      |       |       |
| tcttcaacc  | tgtttttggga | gtgcagatgg  | tagctctagg  | aatttacag  | agaagaacaa  | 41760      |       |       |
| aaaatgggat | gagctgggtg  | tgagggcctc  | tcagtgcttg  | agaggcagag | gcagaggcag  | 41820      |       |       |
| gggaatctct | gtgggtacaa  | ggacagcctg  | actgacctgg  | tggattccgg | gctaaccgaa  | 41880      |       |       |
| actacaaaat | aagacactac  | ctctaaagtt  | aaaacaaaaa  | agggaggcaa | taagtatgca  | 41940      |       |       |
| tagctaagca | ttctattcta  | ttctgcccc   | accactctaa  | ttgacggcta | cctccagtct  | 42000      |       |       |
| gaagtaagg  | tcttgcagta  | gctaggaaga  | ggactacctc  | ccaggctgac | tgttcctggc  | 42060      |       |       |
| tctggcaaca | aactgaaaag  | gaaaactgg   | tcagaaggag  | atcagagcag | aggggcccc   | 42120      |       |       |
| ttagaacgag | gattgtgcct  | tccttcaggt  | ttagaacaac  | cactggagaa | ttttaggtac  | 42180      |       |       |
| tgctgtggta | gtttggaaca  | agacgaggca  | aaaacttatt  | actggcaatc | tgtaatgtcc  | 42240      |       |       |
| ccataaatcc | tttttatatc  | tatttttaaa  | aagatttcta  | tattatatgt | acagcattct  | 42300      |       |       |
| gtctgcatat | atgcctgcag  | gccagaagag  | agctccagat  | tttattacag | atcgttgtga  | 42360      |       |       |
| gccaccatat | ggttgctggg  | aattaaactc  | aggacctctg  | gaagagcagc | cagtgtctct  | 42420      |       |       |
| aacctctgag | ccatctctcc  | agccctctat  | tttatttttt  | aaaagaatta | ttttatgtgt  | 42480      |       |       |
| atgaatattt | gcatgtatgt  | atgtgcacca  | cattcatgca  | gtgcctatgg | aagccagaag  | 42540      |       |       |
| aggacgacag | attccctgaa  | accagagtta  | caggggctgt  | gagttgcttt | atgggtgctga | 42600      |       |       |
| gaactgagct | tccttctctg  | acaagaaaag  | cacatgctgt  | taaccactga | gctgtccctc  | 42660      |       |       |

|            |             |             |             |             |            |       |
|------------|-------------|-------------|-------------|-------------|------------|-------|
| cagccctccc | caccctttg   | tgtgtgtgtg  | tacttgtatg  | tgtatgtatg  | tggacatgtg | 42720 |
| agcatgtgtg | gaagtcagag  | gatggtttgc  | aggagttggg  | tctctccttc  | taccctgtgg | 42780 |
| gtcctagggg | taaaactcag  | gctggttagca | tgtccctcta  | cctgcaaagc  | catctcctgg | 42840 |
| gctttgtccc | aataaatttc  | ttgctctccc  | ttggtatcct  | cattcttaaa  | gggaaggaca | 42900 |
| gagctacagg | tacaatgggt  | gaaaattggc  | ctttagttac  | cagtcttgaa  | gatgagtact | 42960 |
| taaatTTTTT | tcagaatcct  | TTTTTTTTTT  | ttaaattcttt | ttatttatgt  | atacagtatt | 43020 |
| ttgtctgcat | gtatgcctcc  | aggccagaag  | agggcaccag  | atctcataat  | ggatggttgt | 43080 |
| gagccaccat | gtggttggtg  | ggaattgaac  | tcaggacctc  | tggaagagca  | gacagtgctc | 43140 |
| ttaacctctg | agccatctct  | ccagctcaag  | aatcctTTTT  | TTTTTTTTTT  | TTTTTTAAGG | 43200 |
| cagggtttct | ttgtgtagcc  | ttagttgttc  | tggaattagg  | tttgtagacc  | aggctggcct | 43260 |
| gaattcaaag | accacactga  | ctctgcctcc  | cagggtgctg  | ggactaaagg  | tgtgtgccac | 43320 |
| gacacctggc | taagatgagt  | gctTTTTTaa  | tgcctatcac  | atctacaggc  | acaactgatt | 43380 |
| gggaagctga | ttcaaactt   | gagatagcaa  | agggatagag  | gtgttgatgc  | aacataaaga | 43440 |
| cagagatgcc | cagatTTTTct | ccttcttTta  | gtcactgggc  | gggactctgc  | aggtccagtg | 43500 |
| aggactcact | ggctctcttg  | ttaaagcctt  | atttagagtt  | aagccaatcc  | ttggaagagg | 43560 |
| catcattcat | tcattgaaca  | cttgcagtgt  | gttaccctgt  | taattcagca  | gaaagcaaga | 43620 |
| cagctttagg | ccacacctgg  | agcagctgga  | ccagagacca  | agtggaaagca | ggaatgctga | 43680 |
| tgtacacttc | tcatcctgat  | ccctggagg   | ctgtcagcct  | gggccacaca  | gtgcgagatc | 43740 |
| ctgcctcaaa | aacgTTTTtg  | ctaccattg   | gtgattgtac  | atgtactttg  | ttctagcact | 43800 |
| caggaggtag | ggccagcctg  | gtctacaaaag | gacagccaat  | gctacacaga  | gaaaccctgt | 43860 |
| ctagaaaaac | aaaacaaca   | cagaaacttt  | tttgtctgat  | gtttcatctt  | gtttcttttc | 43920 |
| taataatgta | ctgggcagag  | aaaaacaaa   | taatgcagtt  | gggcctggag  | gcttagacct | 43980 |
| gggattccag | cacttaagag  | atagaggcaa  | gctcattgct  | ttgagtttaa  | ggtccctctg | 44040 |
| ccctgcatag | tgagttgcag  | gtcagtggtg  | actatagagt  | aagaccttga  | ctttcaaaaa | 44100 |
| gcacaagggg | ccaggcgttg  | gtggctcaca  | gctttaatcc  | cagcactcgg  | gaggcagagg | 44160 |
| caggaggatc | tctgtgagtt  | tgaggccagc  | ctggctctaca | gagggagttc  | caggacagcc | 44220 |
| tccaaaacaa | tacagagaaa  | ccctgtctca  | aaaacaaaac  | aaaacaaaac  | aaaacaaaaa | 44280 |
| tgtcaaaaag | cacaagggcc  | atcaaaatgg  | ctcagtgggc  | aattacaaac  | ttgatgacct | 44340 |
| gagtccattc | cttgagacct  | acataatgga  | aagaactgac  | tcccctaagt  | tgtcttctga | 44400 |
| ccttcacaca | taccgtgtgt  | gtgtgtgtgt  | gtgtgtgtgt  | gtgtgtgtgt  | gtgtgtgtgt | 44460 |
| gtacatgcac | gcgctctcgt  | gagcaagtac  | gctcctgata  | ctaaattaat  | aaaaggatt  | 44520 |

|            |             |             |             |             |             |       |
|------------|-------------|-------------|-------------|-------------|-------------|-------|
| aaaaaagtaa | aaccacaaac  | atgaaccaa   | ccaatgtggt  | gtaataacct  | atgtctggag  | 44580 |
| aactaacagg | tttctggacc  | cagagaggta  | gagaagataa  | tctaattgtct | tcaggggaat  | 44640 |
| tagggggata | aagcatcaga  | gcataaagaa  | agtttccctc  | acttgggaag  | tagtggaggc  | 44700 |
| aggagcatca | ggaattcaag  | gtcatctcat  | ctatatagta  | agtaagttca  | agactagcct  | 44760 |
| gggttacatg | agaccctgtc  | tcaaaaaaaaa | aaaaaaaaaaa | aaaaaaaaaaa | aaaaaaaaaaa | 44820 |
| ggaagcatgg | tgcaacagat  | ttgagattga  | aacacaaaaa  | tagctcaact  | ctggggcaga  | 44880 |
| cagcagagtc | aggggaaagt  | ctaaggaagt  | tctggggaaa  | gggtcaggag  | gccctccct   | 44940 |
| gcttcattca | cgccccaaac  | atctattaa   | cattccatgt  | gtacttgggtg | tttctggcct  | 45000 |
| gaggatgact | cacagaggct  | gacacactaa  | gttaatcaca  | ggaagcacag  | aagaaaaaaaa | 45060 |
| aaaaaaaaag | aaaaaacagg  | cctaattgca  | tggaatgcct  | gactgagggg  | gttcttcaca  | 45120 |
| gtgctttgga | gacgaccctt  | tgtgtctcat  | tgaaattcat  | ctctcaagaa  | acactcctca  | 45180 |
| aatgtttaca | cattgtcagg  | cactttgagc  | tgaggggaca  | cagaggactc  | agttctggtc  | 45240 |
| cctgcctttg | gaattcaca   | ttgttgctct  | tccaaagaac  | tggggttcgg  | ctctcagcac  | 45300 |
| ccacttaagg | aggcccatga  | ccatttgtaa  | cttcagctca  | accgcttcca  | caagtaccca  | 45360 |
| cacacatgtc | tgtcccccaa  | acacacctat  | attcttcatg  | ctaaccttgt  | gacactatga  | 45420 |
| gcaaaatcaa | agacattaag  | aagccagggt  | cagtgccttg  | tgcttagtc   | ctaacatttg  | 45480 |
| agaggctaaa | tcaaacagga  | attgaggcca  | cttgacagc   | atcaagagaa  | attatctttg  | 45540 |
| aacatatgaa | atgatattat  | cacagaaata  | gaattgcaat  | ttaaaccagg  | tatgtgatcc  | 45600 |
| cctctcccc  | cacaaaaga   | aaaaaaaaata | gagggtgga   | gaaatggctc  | agtggtaaaag | 45660 |
| agcacctgct | gttcttgcaa  | aggatctaga  | ttgttttggt  | ttgttgagac  | agagccacac  | 45720 |
| tatgtaactc | tggtgtcct   | ggaattcact  | atgtagatca  | ggctagctgg  | tatgtatgtc  | 45780 |
| tgtccacaaa | tgcatgcctg  | gtgttagagg  | cttcagaag   | tgtgtgtcag  | accctctgga  | 45840 |
| actggagtta | taggtggttg  | tgagctgcca  | tgtgggtgat  | gtaattgtac  | ttgggccctt  | 45900 |
| tgcaagagca | accagtgcc   | ttaaccctg   | atacttgctt  | ttaaggaatt  | tgcatTTTTG  | 45960 |
| TTTTGaaatt | acatgttgga  | aaagTTTTcc  | acatcagtaa  | gaaatgccat  | ccttactatt  | 46020 |
| tcttctgca  | gcttctcaga  | aatTTTTTTT  | aatTTTTTTT  | ttaagattt   | tatttattta  | 46080 |
| tttattatgt | acacaacatt  | ctgcttcatg  | tatatctgca  | caccagaaga  | gggcaccaga  | 46140 |
| tctcattcaa | ggtggttggtg | agccactatg  | tggttgctgg  | gaattgaact  | caggacctct  | 46200 |
| agaagagtag | tcagtgtctt  | taacctctga  | gctatctctc  | cagcccctca  | gaaatatttt  | 46260 |
| aattcaaaaa | tctttcttag  | ccagctctca  | agccactgga  | ttacttcttg  | cttctgctac  | 46320 |
| tgacatagac | ttcatcttga  | ttcactccat  | acagcaacta  | gatgtgtgta  | tataaatgac  | 46380 |
| agatagatca | tagatggatg  | gatggatgga  | tagatagata  | gatagatgat  | agatagatag  | 46440 |

|             |            |             |            |             |             |       |
|-------------|------------|-------------|------------|-------------|-------------|-------|
| ataatctcac  | ttgctaccta | ggctgacctc  | aaactcatgc | ctcagtttcc  | taagtgatgt  | 46500 |
| gattacgggc  | atacactatt | atgcctagca  | taaccatttg | tttgccttaa  | aatTTTTTaa  | 46560 |
| gattaatTTT  | ttattatgta | tacagtattg  | tgctgcagg  | ccagaagagg  | gaatcagatc  | 46620 |
| tcattacaga  | tggttgctag | ccaccatgtg  | gttgctggaa | cttgaactca  | ggacctctgg  | 46680 |
| aagaacagcc  | agtgcTTTTa | gcctctgagc  | catctctcca | gccccagcc   | tttaaaatTT  | 46740 |
| TTaattaatt  | TTTTTTTTgt | ttgtgtatgg  | gtgtttggcc | tgcatgtagg  | cctatgcact  | 46800 |
| atatgtgtgt  | agtactcacc | tagaccagaa  | gagggtgcca | gagactctgg  | aattggagtt  | 46860 |
| tcagtgcattg | atgagctgcc | aagtgggcct  | taatccccaa | accccagagg  | gttgaagagg  | 46920 |
| gatcagtggc  | taaggggtgt | tgttcttgca  | gaggaccag  | TTTTgattcc  | cagagcccac  | 46980 |
| atggtagctc  | agaacaagaa | ctccggcttc  | agaggattct | gcacctctc   | tgggcctcat  | 47040 |
| ctggtaccag  | gcatacatct | ggtatgcaga  | tatatacacg | ccctgagtgg  | tgacaaaacac | 47100 |
| tctgtgagtt  | caagggctgg | ctacatagag  | aattccagga | catagtgaga  | ccctgtctca  | 47160 |
| accaaacaac  | ctggatcctt | tgcaagaaga  | gcaggtgctt | TTaaacactg  | ggccatctct  | 47220 |
| ccagcaccac  | ctccccctt  | taatgataca  | taggtcccac | atagcctagt  | tcggcctctt  | 47280 |
| aactcctgac  | ataacacctc | atgaattcct  | catcctcctg | cctctacctt  | ttgagtgagt  | 47340 |
| gacgagatta  | caaacgttcg | ccaccatctt  | tgttcccagt | tggccctcaa  | ggccccaggg  | 47400 |
| tctcagttca  | gatcctgcca | ctatggatac  | atagcattga | aatggggaag  | gctgcctctg  | 47460 |
| tgctgcctca  | gcctttgggt | gacgcctctt  | gcttggcact | gcattttcag  | gagcatgaca  | 47520 |
| tctttgctct  | ggaccctgac | ccaaggttg   | tgtggagctg | taagaagtgt  | aaggggtgtct | 47580 |
| ggatttggtg  | gcgcgcgcct | TTaatcccag  | cactcgggag | gcagaggcag  | cagaggatct  | 47640 |
| ctgtgagttc  | aaggccagac | tagactacag  | agcgagttca | ggacagccag  | ggctgttaac  | 47700 |
| acagagaaac  | actgtcttga | aaagcaaaac  | aaaataaaac | caacaaaaca  | acaacaacaa  | 47760 |
| caaagtgtta  | agcgcgcatg | caaccagcca  | ctgggcaatt | agtcaaagat  | gccaagtcta  | 47820 |
| gatagacatg  | cagTTaagaa | cttagggctct | agagagatgg | ctcggtggtt  | aagagaccag  | 47880 |
| aagagtttgc  | atcccagcgc | tcgcacagta  | gctaacaaca | gtctatctta  | caccctcttc  | 47940 |
| cagcctctcc  | tggcacaagg | aacacacgtg  | gtgctcatag | ttacaaaaca  | gacacaacac  | 48000 |
| gcatacacia  | agaaataact | aatTTTTaaa  | atgtcttgta | atcaagtaaa  | agtgctaact  | 48060 |
| ctagggacta  | aattaattcc | tcagtcgccc  | tactccagga | gcggtaaggc  | tggccagaaa  | 48120 |
| gaccaagaac  | gcacgcgcgg | aggagaaacc  | acagagtcgg | tcctccccggg | atagagaggc  | 48180 |
| cggaaagtgt  | cgcgagctg  | cacgcgggtg  | gctggaagcc | tactgagccc  | cgaggaaggg  | 48240 |
| ctccgctcgg  | ggcttggcgt | ggtgggtgag  | ccggagggtc | ggcgtgagcg  | gcctgggctt  | 48300 |

|            |            |            |            |             |             |       |
|------------|------------|------------|------------|-------------|-------------|-------|
| tggttctgaa | tgatggcgtc | tcgggcaggc | ccgcgagcgg | ccggcaccga  | cggcagcgac  | 48360 |
| tttcagcacc | gggagcgcgt | cgccatgcac | taccagatga | ggtatgaggt  | gagccaggag  | 48420 |
| cactgaggcc | ttccccggga | ggagcctgcg | ggtctcggga | agcgacgcgg  | gcgagcctca  | 48480 |
| cggtgccgct | ccccagcca  | gctgtcgcgt | actaccgggt | ccccggctcc  | ggcgagcgcc  | 48540 |
| tcgggtctgt | ttacaggccg | ggaagcccag | tggcctgccc | tcgcccgcct  | cgtgctttga  | 48600 |
| gggatctg   | cctgcagagg | ctcaggggtc | gatgctcagc | ccctctgaat  | gaccttggag  | 48660 |
| acatcatttt | tcttttttca | aatcgaggtc | ccgcagtgct | tagagttcag  | gctggcctgg  | 48720 |
| aactcacggc | cttccctcct | cagcctcccg | agtatgcgcc | tggctctgaaa | actaacattc  | 48780 |
| ttaaagaaaa | ctgcgtgtgt | gcgtgtgtgt | gtgtgtgtgt | gtgtgtgtgt  | gcgcgcgcgc  | 48840 |
| gcgcgcgtgt | gtgtgtttgt | gtgtgtgtaa | gtttgccac  | acgagagcag  | gtgtgctggc  | 48900 |
| agaatgcagt | gccagtaaag | ggtgtgtgtg | tgtgtgtgtg | tgtgtgtgtg  | tgtgtgtgtg  | 48960 |
| tgtgtgtgtg | tgtgtgtgtg | tgtgtgtgtg | tgtgtgtgtg | cgcgcgcgcg  | tgtgtgtgtt  | 49020 |
| tgtgtgtaag | tttgcccaca | ttcttaaaga | aaactgcgtg | tgtatgtgtg  | tgtgtgtgtg  | 49080 |
| tgtgtgtgtg | tgtgtgtgtg | tgtttgtgtg | tgtgtaagtt | tgcccacacg  | agagcagggtg | 49140 |
| tgctggcaga | atgcagtgcc | agtaaagggt | gttgatctc  | ttggagctat  | agttacagac  | 49200 |
| gtgtttaaat | ccacctgaga | ctagtactga | ggaccaaacc | ccgaagtgat  | tttgtgagat  | 49260 |
| agcggcttgg | tatgggggcc | atgctagcct | ccaggagcgg | caggtgctct  | taaccactga  | 49320 |
| gccatctctc | cagtccccag | gctgtcttgg | aacttgctct | gtagaccaga  | ctagaaatca  | 49380 |
| gagatctgcc | tgctctgct  | gccaagtgca | aggattaaag | gtgtacacta  | cagccgccct  | 49440 |
| gttgaccctg | tctttaggaa | gatgtcatgt | gtactttaca | aagagttttg  | atgtagtcat  | 49500 |
| gtcttaagct | ttgttgtcac | acaagatgaa | attaattacc | accagggaat  | ttttcatcaa  | 49560 |
| attgtgctgt | acttaaatat | gcctaaagta | aaatacttgg | ggtcagactc  | ttgaagtta   | 49620 |
| aaccaacacc | aggactgag  | ttgtgttgaa | cccacacaac | taccttgcct  | cctgcagatt  | 49680 |
| gttaactctg | ctggctgtgg | tggttgaaga | gacccccaca | ttggcttagc  | tgtaagagc   | 49740 |
| acttgctgtt | cttggagagg | gtctaaactc | agttcccagc | accgacatca  | ggaggctcac  | 49800 |
| aaccaaacac | ctgcaactcc | ggttccaggg | gttccgatgc | cctctggctt  | cccgacagca  | 49860 |
| caggcgtgtg | cgtggtgcac | acacatacac | atgagataaa | tttttaaaaa  | gaaagaaaag  | 49920 |
| ccaatctggg | tcctgccttc | aaggagcttg | agtgccagaa | gtgattcttt  | tctccttacc  | 49980 |
| tcccacattt | cctataacaa | attaattttc | cccttaaadc | caactgaatta | ttcaactggt  | 50040 |
| tcttggcctc | tttctttaca | gaaggatgac | aagccctttg | gacccttctt  | tttcaacttt  | 50100 |
| aggcccctgc | ctaattgatg | ctcttgtttt | catgcgtacc | tagagcagac  | accttgcctg  | 50160 |
| tgacaatatg | aaaaggatat | aattgagacc | ccgagaagat | caggactaag  | agatgtgcct  | 50220 |

|            |             |            |            |            |            |       |
|------------|-------------|------------|------------|------------|------------|-------|
| ccttctcatg | gaaactatat  | ctggagaaat | acagggagcc | caaactgtgt | tccttgttgc | 50280 |
| taggcctccc | cctaattggcc | tttgtttctg | tgatacgaag | ccatctttct | aaccacagct | 50340 |
| cagaattctt | gtcatggctt  | ggtgagataa | tgtcttagta | cgttgtccag | gccaacctcc | 50400 |
| aatcagagat | cctctgcctc  | agcctcccag | gtgccattac | tgttcttcag | tcttgaagtc | 50460 |
| tacacatgca | tggcttttgt  | aactgttact | acctctctgt | gccttggcag | ttgatttctt | 50520 |
| gaaacacaaa | tactaaaaag  | cttattcctt | tgtgcctgca | tgtttttgcc | tctgcgtaga | 50580 |
| agcccacttc | cactcgtctc  | attacctctg | ctgaaatagc | tctctcctct | agatataacc | 50640 |
| ttctctggct | ttccatctca  | tgctaattgg | ttcttccctg | ggatagcggg | tatcttcggt | 50700 |
| ttatatgtat | ttacttgagt  | tttatacttc | atgtttccca | gcctctatca | gaggctgtgt | 50760 |
| cattcagatt | gtatctatgt  | gtccagtacc | ggtgcctggg | ggtcggagca | atttaaataa | 50820 |
| aaattgcttc | tccctctgct  | ctgccttaca | gtgtgacgct | caagagtgaa | atcaagaagc | 50880 |
| tgatctacgt | acatctgggc  | atatggctgc | tgttggttgc | caagatgtgt | gtgggacacc | 50940 |
| tgaggctctt | gtcacatgac  | caagtggcta | tgccctatca | gtggaatata | catatttatt | 51000 |
| gagcattgtg | ccctctctct  | tgggccttct | ctccttctct | gaaacaacat | tagctacctg | 51060 |
| gtgctctcca | tgatcagcat  | ggggctcttc | tccatcgtct | ccctcattta | tggcagcatg | 51120 |
| gagatgttcc | ctgccgccc   | gcaactctac | cgccatggca | aggcctaccg | cttctgtttt | 51180 |
| ggtttctccg | ctgtctccgt  | catgtaccta | gtgttgatac | tggcagtcca | agttcatgcc | 51240 |
| tggcaactgt | actacagtaa  | gaaactotta | gactcttggg | tcaccagcac | acaggagaag | 51300 |
| aaacgtaaat | gaagcctgcc  | tgatggacac | atgaagggag | ctgttcagaa | tctccatgga | 51360 |
| ctgtggcacc | tgtgatgttg  | gcacctagtg | cacactatcc | tcagattttg | gccttgagtt | 51420 |
| ctctgttacc | atctgctgag  | atgacaaatc | tgtagtgttt | aatttattct | tgactagcca | 51480 |
| caaaccggat | gaccgatgtc  | tgtggaacac | ttcaagttga | ggcctccag  | actgagcctt | 51540 |
| atccttgcct | tctcttgggc  | aaattcctta | cttccattta | tcacctcttc | atcaccgata | 51600 |
| ctaaaagaga | tctggaataa  | atcagtgcag | aaattctact | tcaatctgta | ggtcatgggg | 51660 |
| caagcaacat | ttgggaagtt  | gtccccctaa | aggctactct | gtttactgca | aaccatttta | 51720 |
| atataaaaag | aacttcaata  | aagttaagac | tgtcctgtgc | tttgtgtttg | agatttgatt | 51780 |
| gaatttcaaa | gttgtattgc  | tctagaggac | ttagacatta | tgagaagaat | agatgtttcc | 51840 |
| tgagaacatg | ggactggcgc  | tggaggagag | acagtgtgaa | gagtcttaag | tcagctgcag | 51900 |
| ccctctagct | cttaggtgag  | aacaaccctg | ggatgggggt | tgctggagga | atggctcagg | 51960 |
| ggttaagagc | actgacagag  | gacacagggt | tagttctcag | cacccaaatg | gtgacttaaa | 52020 |
| accatttgta | actactgtcc  | cagggcattt | gacgccttct | tgcctccgga | tgcactaggc | 52080 |

|             |             |            |             |             |             |       |
|-------------|-------------|------------|-------------|-------------|-------------|-------|
| agacatgagg  | tacaaaaaca  | aacatgcaag | caaaacactc  | aaaaaattaa  | aaaaaaaaaa  | 52140 |
| catggctctct | caatgtagct  | gtggatgtac | tagaactcac  | taagtagagc  | aatctgggct  | 52200 |
| caaaactcaca | gagatcctcc  | tgcctttgcc | taccaagtac  | agggatttaa  | ggtatgtgcc  | 52260 |
| accacactta  | gcaatatata  | tttggccaga | catttaatct  | ccaccataa   | agcagcttat  | 52320 |
| ttggcttgga  | ttatgagctc  | ccctttttat | gcttgtttga  | gacagggctt  | ctctatagct  | 52380 |
| ctggctgtcc  | tggaacttgc  | ttcgtggacc | agactggcat  | caaaactcaa  | tccacctgcc  | 52440 |
| tctgcctccc  | acgtgctggc  | attaaaggtg | tgtgcatcac  | tgcccagctg  | ggttacgagc  | 52500 |
| tttctatttg  | gttatttatg  | tttattagac | ttttatgtgt  | ctaaaactga  | gtaataatac  | 52560 |
| ccaaaaagaa  | tctgcttggt  | ggggtataa  | ttttccagta  | actgacaaat  | aaacctgagt  | 52620 |
| caaaataaga  | agaaaggggt  | ttgagttcct | tttccctttt  | agtttctgtc  | attgattatt  | 52680 |
| ccttggcctg  | cttgtttggg  | gaatgtgcaa | aggaagctgc  | taactctatg  | gaagccagaa  | 52740 |
| aaagaaaaag  | gtgagattcc  | agtgtgocca | ctaggggcag  | actgccagtg  | acgtaacttc  | 52800 |
| ttcactcagc  | ccctcccaaa  | gcttctocca | cctccaaaaa  | tgtcaaggac  | tggttaactag | 52860 |
| tacatgggccc | tttgagaaaa  | gatagcaggg | agcttccagt  | cttgggggaa  | tgtgcagtga  | 52920 |
| acataacatc  | taattgtgtg  | agagaccac  | agctgagata  | cagtttaaga  | gtcacaccta  | 52980 |
| gaagtcttca  | cagtaaataa  | ggcagcaaag | gtgtgcatcc  | ctttgcaactg | gactttatta  | 53040 |
| tgcctagatg  | atgctcagat  | ctgtaactgc | agagatctgg  | ccactacagt  | tgtaattcct  | 53100 |
| ttgtcctgga  | aatgtgttgc  | ttgtacagtc | tgcaaagcta  | attcctccag  | ctatcccact  | 53160 |
| gatcatttct  | ttggagcagg  | ggcagtttcc | agacagaatt  | tctctgtgta  | gtcctcgcta  | 53220 |
| tcctggaact  | cagagatctg  | cctgctgtgt | gctgggacta  | aaggcatgta  | ccaccatgcc  | 53280 |
| cagctcctac  | tgatcatttc  | aaagataact | tcttgtgcct  | caggcctatt  | gctgttcctg  | 53340 |
| cttcctgtgt  | ttacgggaac  | acagctctgg | atcatccacc  | ctgcaagttt  | aagtccgtcc  | 53400 |
| ccactccata  | tacacactgc  | ctattcggtg | aacctcctat  | agataccctg  | ataagttccc  | 53460 |
| tagcttctca  | gtttaacact  | tagaactctc | cctacttaag  | ggaggcctct  | cagtggtgaa  | 53520 |
| gtgctcctct  | agcatgcacc  | gaggcctggg | tgtgactccc  | tcgtaacaac  | aaataaaaaac | 53580 |
| aaaccttttc  | tgctcttaca  | ttcctttatt | aatctttaag  | atgccacttg  | tatgaaaatt  | 53640 |
| cctcaatfff  | caattcctca  | atftgaagaa | caactftaat  | ttgtctggft  | gctftcacct  | 53700 |
| tattcctftta | ttattatfff  | ctaacaagac | agagcccaga  | atgacctta   | gctatgtggc  | 53760 |
| tgaggatgac  | tttgaactcc  | tgatgctftt | tctctacttc  | ctaagtgcta  | ggattacaag  | 53820 |
| tatgcacat   | cactcctggc  | ttatattact | cgftcccccac | ccccacccca  | tagaccaagc  | 53880 |
| cftgacctft  | atftfttaaaa | gctgcatatt | tattctgctt  | tctgacttag  | tgftftgtgcc | 53940 |
| ttcaacactt  | tcacaacct   | tttctctcct | caataaggaa  | agcctgcttg  | atcctgtcac  | 54000 |

|             |            |            |            |             |             |       |
|-------------|------------|------------|------------|-------------|-------------|-------|
| ggacacactt  | ggcacacaag | gagccaccac | agcccctgct | gacgtgcttc  | tttgtctaga  | 54060 |
| cagtctcata  | aggactttgg | gtctcacagc | atgaaccctt | caagtctgcc  | tgggcacaca  | 54120 |
| ccacatgggg  | attcaggtgc | tttcccagtc | ttcttggtat | aaaggtaaac  | aatcctgttg  | 54180 |
| ccagggttcg  | agacagccta | gtttcgttag | aggctgtatt | gtaggaaagc  | ctacaatggt  | 54240 |
| atgtcaaaca  | ctggaccatt | cgagtgcctc | taagcaccat | ccctggaaga  | ggaagagctg  | 54300 |
| tattatttgt  | tttatattga | cagaattgct | actttgtatg | tcttctgtag  | ctcattagtg  | 54360 |
| ttcactctga  | gcttattgaa | tgaattaact | tgcccttttg | aggacaaagg  | tctgtatttc  | 54420 |
| acagaaaaca  | gaactggact | gaagcagaaa | gaagcccatg | gacaagggag  | tttgtcatga  | 54480 |
| gcttagctga  | ggcacacatt | gctaacttca | aacaactgtg | atgcaaacaa  | ttaaaactgc  | 54540 |
| agtgacagacc | cccctgcttt | ctcccaataa | attttccaca | taagttctgt  | cccccccca   | 54600 |
| aaaaaaaaac  | ctgttagcac | attattagtc | aaagagctaa | aacctgtttt  | tggtcacacag | 54660 |
| aatagtgttt  | tactgaaagt | ctttgaatac | ctttagact  | aatttcactc  | attgtgaaat  | 54720 |
| tagtcaacag  | ttttaaaca  | ctatcatgcc | aacatcagtt | tttgttagtt  | ttgtgcttgg  | 54780 |
| aattctgctt  | ttctagcctt | ttcctataac | ttttttctgc | ctcatggtta  | tgggtgtcac  | 54840 |
| aagtcctctt  | gatttagtgg | gaagaatgct | atttgggtta | gaaagttcag  | ctgggtatgg  | 54900 |
| gggtacatgt  | ctaataccaa | cctttggcag | gttgaggcag | caggaataact | ctgagtttga  | 54960 |
| ggccagcctg  | acatacatac | atacatacat | acatacatac | atacatacat  | acatacaaac  | 55020 |
| actatctcaa  | aaaacaaagt | tggagttaaa | gtatcaacca | caggactaag  | atcaacctgc  | 55080 |
| ctgttcacag  | gttgctttaa | agctccaata | gccggttga  | gagatggctc  | agaggttaag  | 55140 |
| agcactggct  | gctcttccag | aggtoctgag | ttcaattccc | agcaaccaca  | tagtggctca  | 55200 |
| cagccatcca  | ttatgaggtc | aggtgcctc  | ttctggtgtg | cagatgtaca  | tggaagcaga  | 55260 |
| atgttgttac  | ataataaata | cataaaatct | taaaaaaaa  | aaactccaat  | agccaaagta  | 55320 |
| ttatgaaggc  | attctaaaat | ttttaattta | ttttcatttt | atttttggag  | acacagtttc  | 55380 |
| tctgtgtaaa  | aaccccaact | gtcctggaac | tactctaga  | ccagactggc  | ctccaactca  | 55440 |
| cagagataaa  | cctacctctg | cctcccaagt | actgggatta | ggccgggcag  | tggtatcgcc  | 55500 |
| cacctttaat  | cccaacactc | gagaggcaga | ggttgggtga | tctctgtgag  | tttgagacca  | 55560 |
| gcctggtctg  | caagagctag | ttctaggaca | gcctccaaag | ccacagagaa  | accctgtctt  | 55620 |
| gaaaaaaaaa  | aaaaacaaac | aaaaagcaag | ttaatctgga | attaaaagtg  | tatgccacca  | 55680 |
| cacctgatgt  | aaatttaaaa | ttttttttaa | attaattttt | ctatacacag  | gtgtttttgcc | 55740 |
| agcatgtatg  | tttgtatagc | acatgtgaac | ctgggtgcct | aaaagccaaa  | agagtgcctc  | 55800 |
| tgatcccctg  | ggactggagt | tacaaatgga | gtgctgccat | gtgggtgctg  | agaattaaaa  | 55860 |

|            |            |            |            |             |             |       |
|------------|------------|------------|------------|-------------|-------------|-------|
| ccaaatcttc | tagaagagca | gccagtgagt | gcccttaact | gctgcagcat  | ctttctggct  | 55920 |
| cttgtgaagg | cattttatgg | agtctgtaac | accatatggg | tatcaaaagc  | cgtgtgggtca | 55980 |
| cctgatcttt | gcagcaagac | aggagagaga | agggtgttga | gagacttgag  | ggatgggtcta | 56040 |
| gacaccaaag | aaaggtttgt | gtgttgtgag | caatgactga | ttattaggtt  | gagattctag  | 56100 |
| ccagggagtt | tactatctct | tgtttgattt | attacatttt | attgccatcc  | taggaattaa  | 56160 |
| atagggtttt | acatttgcta | agcaagtgtt | ctctcaacat | ccttatatcc  | cctccccgat  | 56220 |
| ttctgacact | tactatagct | cagcttgtcc | ttgaactcag | caatcctgcc  | tccatagtgc  | 56280 |
| cgggattatg | gatgtttcca | ctcccagctg | agcctgttct | tcatgtgttg  | catgggcatt  | 56340 |
| gcagatctct | cccattgctg | tgaggctgaa | ataaatgtgg | atgaactttg  | tagtacatag  | 56400 |
| tcgtttacat | atcaagatgc | ctttccttgg | taaacagtgt | tatgcttgcc  | tctcaaattg  | 56460 |
| ggagtgtctt | cctgttttaa | gaataatcct | cttccctctt | ttcttctctt  | ctcctccttt  | 56520 |
| cccctccttc | tgacagggtc | totttataga | atattcctgc | ctctctctgc  | cttccaaatg  | 56580 |
| ttgtgtaggt | gtacatcacc | atgcctgcct | agttagaatg | acgtctcaga  | atgctggagg  | 56640 |
| ttaatttcac | attcttagtc | cacattatcc | tgactgggat | gttcaagggtg | ccctgacagt  | 56700 |
| aggtacagac | ccagcagacc | tcaggaagtg | accattacag | caagatcctg  | tagctgctac  | 56760 |
| tcatagcctg | ttgggagccc | gtgcatagga | aagaatggca | agaaaaaatg  | gctgccagag  | 56820 |
| ggcgtcccca | tagtatactc | tgtcactaag | catgcatgct | tcagagcttg  | ccaaaacctc  | 56880 |
| ctgagtcctt | ggcttggctc | ccaaataaag | gtcattagag | catgaagtct  | tgggtcaactg | 56940 |
| attgagactc | ctttggagag | tgcaaggctt | ctatgtagat | gcccctgttg  | cctcctattc  | 57000 |
| tgtctaattt | cttactctcc | ctgttgacag | ctgccaatct | cctttctcct  | aggactgtgc  | 57060 |
| ccactcatca | ctcactgtga | taagaccctt | ttccttttct | ttgttccttc  | ctgggtctgcc | 57120 |
| tgctgcccc  | cccccccacc | tctccctttt | catggtctca | tgaaaactgc  | tctcagactc  | 57180 |
| actatgtagc | taaggatgac | tggagctccc | aatcctcctg | cccctacttc  | cctaattctg  | 57240 |
| ggattacaag | tttatgccac | cacattccac | tttctgattt | ccttccttac  | atcttaattc  | 57300 |
| cactagcttt | atcacactgc | taaagctaaa | actttctttg | caaaatgaga  | tccagaaacc  | 57360 |
| cacagactct | ccatagtagg | ttctgacagg | gaaacagctg | acattgtatg  | gtgttctgcc  | 57420 |
| ttcccatttc | tttgcgtgtg | gtgtttttgg | acaagtctcg | gtcttcctgt  | atttccttcc  | 57480 |
| ttccttcctt | ccttccttcc | ttctttttcc | atTTTTtatt | tgaattataa  | acacgattgt  | 57540 |
| tttacatggt | aatcccagtt | ccctctccct | cccctcctcc | ctaccaccat  | ccccactaa   | 57600 |
| aaccctacct | atcacatata | ctttctgctc | cccagggagg | gtgaggcctt  | ccataggggt  | 57660 |
| cctcagggtc | cgtcatatcc | tttgggatag | ggcctaggcc | cacctccgtg  | tatcttggct  | 57720 |
| cagggagtat | ccctctatgt | ggaatgggct | cccaaagtcc | acacctatgc  | taaggataag  | 57780 |

|             |            |             |            |            |             |       |
|-------------|------------|-------------|------------|------------|-------------|-------|
| tactgctcta  | ctacaagagg | ctccatggat  | ttctgaggtc | tcctcactaa | caccacatt   | 57840 |
| caggggtctg  | gatcagttcc | atgctggttt  | cccagctatc | agtctgggga | ccaagagctc  | 57900 |
| cctgttgttc  | aggtcagctg | tttctgtggg  | tttcaccagc | ctggtctgga | cccctttgct  | 57960 |
| cttcattcat  | ccttctctgc | aactgtattc  | cagttcagtt | tagtgtttag | ctgtgggtgt  | 58020 |
| ctgcttctac  | ttcttccagc | tgctggatga  | aggctatagg | atggcatata | agtcagtcac  | 58080 |
| caatgtcatt  | atcaggggag | ggcatttaaa  | gcagcctctc | ctctgttgct | tagattgtta  | 58140 |
| gttgggtgtca | tctttgtagc | tctccaggca  | ttccctagc  | gcctgatttc | tctgtaaacc  | 58200 |
| taaaattttc  | cctctattat | ggtatctctt  | atcttgtttt | cttctattct | tcccccaact  | 58260 |
| caacctttct  | gctccctcat | atactcatct  | tcccttctca | ttctcctagc | tccttcctcc  | 58320 |
| ccttcccaat  | ttgctcagga | gatctggctc  | ctttcccctt | ctccagggga | ccatgtatgt  | 58380 |
| ctctcttaga  | gtcctccttg | ttacctagct  | tctctggctt | tttttttttt | tttaagattt  | 58440 |
| atctattatg  | tgtacagtgt | tctgctgca   | ggtcagaaga | gggcaccaga | tcccattaca  | 58500 |
| gatggttgtg  | agccaccatg | tggttgctgg  | gaattgaact | ccggaccttt | ggaagagcag  | 58560 |
| tcagtgtctc  | taaccgctga | gccatctctc  | cagccctttc | taaaactgga | cattagccta  | 58620 |
| gcctcaaggg  | ttgtgatgct | aacaatacaa  | gctaaagaga | gcaatgggca | tgatccaaaag | 58680 |
| ccagatagtt  | cagcaaatat | tgatttcatc  | ccttcccctt | tcggaacaga | ctccagccac  | 58740 |
| accaaataatg | taaaccagca | agacaaaaaa  | cagcaggcta | tcttttccca | ctttttgctt  | 58800 |
| tgtctatggt  | tgttgacaa  | tgtcaaaacta | tgtagcccag | accctctctg | taactttcca  | 58860 |
| tgtagaccag  | gctggcctcc | aactcaaatt  | cccagcaatc | tacctgtctc | tgctctgga   | 58920 |
| gttctgggaa  | taaaggtgtg | catcaccatg  | cctggcctca | ataagtcctt | gtcttatggt  | 58980 |
| cttcttttct  | cctcctttac | ttcttatact  | cctccctctc | tcttcccctt | ccctttatct  | 59040 |
| ttatttcttt  | attgtcaccg | tttcttttct  | gcttctctta | ccatgcttta | acaaccatca  | 59100 |
| ggaagcaact  | aaccaaattg | tctcatcttg  | agagtcaggt | cagaagatct | aggagtcaag  | 59160 |
| aaagacacgt  | gtaaaataga | gctcacatac  | caagcattag | aaaactcgca | gtggcactaa  | 59220 |
| aagatggctc  | aggggataag | aacacttaca  | tggtgactca | caaccatttg | taattccagt  | 59280 |
| tgagacaat   | tcaatatctc | cttctgatct  | ctaagggcac | ccagaatgta | catacataca  | 59340 |
| ttcaggtaaa  | acgttcatat | acattaaaaa  | taataagcct | taagaattag | aaaagagggc  | 59400 |
| tggagagatg  | gctcagaggt | taagagcacc  | gactgctctt | ccagaggtcc | tgagttcaat  | 59460 |
| tcccagcaac  | cacatggtgg | ctcacaacca  | tctgtaatga | gatctgggtc | cctcttctgg  | 59520 |
| tgtgcagata  | tacatggaag | ctgaatggtg  | tatacata   |            |             | 59558 |
