# Supplementary material for: Characterization and mutagenesis of Chinese hamster ovary cells endogenous retroviruses to inactivate viral particle release
Source: PubMed Central journal article supplement — Biotechnol Bioeng. 2019 Nov 12;117(2):466–85. doi: 10.1002/bit.27200 (PMC7003738; doi:10.1002/bit.27200), 2019-11-12
Supplement: BIT-117-466-s004.pdf [file BIT-117-466-s004.pdf]

**Supplementary Table 1. Predicted number of ERV target sites for Myr- and PPYP-specific sgRNAs in the CHO-K1 genome.**

| sgRNA | sgRNA sequence (5'-3') | PAM sequence <sup>1</sup> | Number of mismatches allowed |    |    |    | Total |
|-------|------------------------|---------------------------|------------------------------|----|----|----|-------|
|       |                        |                           | 0                            | 1  | 2  | 3  |       |
| Myr2  | TCCTAAGCCTAGAACTATG    | Canonical                 | 59                           | 29 | 16 | 26 | 147   |
|       |                        | Non-canonical             | -                            | -  | 1  | 16 |       |
| PPYP6 | GCCACTGCCGCCCCACCAG    | Canonical                 | 55                           | 16 | 9  | 36 | 133   |
|       |                        | Non-canonical             | 1                            | -  | -  | 16 |       |

---

<sup>1</sup> The canonical PAM sequence of SpCas9 is NGG

**Supplementary Table 2a. Sequences of the sgRNAs and corresponding primers used in this study.**

| <b>sgRNA</b> | <b>Orientation</b> | <b>5'-3' targetsite (without PAM)</b> | <b>Addition of G at 5' end for better U6 expression</b> | <b>Oligo 1</b>              | <b>Oligo 2</b>              |
|--------------|--------------------|---------------------------------------|---------------------------------------------------------|-----------------------------|-----------------------------|
| Myr2         | Forward strand     | TCCTAAGCCTAGAAACTATG                  | GTCCTAAGCCTAGAAACTATG                                   | ACACCGTCCTAAGCCTAGAAACTATGG | AAAACCATAGTTTCTAGGCTTAGGACG |
| PPYP6        | Forward strand     | GCCACTGCCGCCCCACCAG                   | -                                                       | ACACCGCCACTGCCGCCCCACCAGG   | AAAACCTGGTGGGGCGGCAGTGGCG   |

Output from Zifit software (<http://zifit.partners.org/ZiFiT/ChoiceMenu.aspx>)

**Supplementary Table 2b. Sequences of the PCR and Illumina sequencing primers used to characterize corresponding genomic loci of edited CHO cells.**

| Primer Name                 | Full sequence (5'-3')                                       | Illumina Adapter                   | Spacer | Gene-specific Primer  | Primer ratio according to expected % of ERVs (total =1) |
|-----------------------------|-------------------------------------------------------------|------------------------------------|--------|-----------------------|---------------------------------------------------------|
| <b>Myr Forward Primers</b>  |                                                             |                                    |        |                       |                                                         |
| Myr_Fa_3                    | TCGTCGGCAGCGTCAGATGTGTATAAGAGACAGACCGCTTGAAGGATTTGCAATC     | TCGTCGGCAGCGTCAGATGTGTATAAGAGACAG  | ACC    | GCTTGAAGGATTTGCAATC   | 0.15                                                    |
| Myr_Fb_0                    | TCGTCGGCAGCGTCAGATGTGTATAAGAGACAGGCTTGAAGGATTTGCAATC        | TCGTCGGCAGCGTCAGATGTGTATAAGAGACAG  |        | GCTTGAAGGATTTGCAATC   | 0.2                                                     |
| Myr_Fb_1                    | TCGTCGGCAGCGTCAGATGTGTATAAGAGACAGTGTGAGGGATTTGCAATC         | TCGTCGGCAGCGTCAGATGTGTATAAGAGACAG  | T      | GCTTGAAGGATTTGCAATC   | 0.2                                                     |
| Myr_Fb_2                    | TCGTCGGCAGCGTCAGATGTGTATAAGAGACAGTTGCTTGAAGGATTTGCAATC      | TCGTCGGCAGCGTCAGATGTGTATAAGAGACAG  | TT     | GCTTGAAGGATTTGCAATC   | 0.2                                                     |
| Myr_Fb_3                    | TCGTCGGCAGCGTCAGATGTGTATAAGAGACAGACTGCTTGAAGGATTTGCAATC     | TCGTCGGCAGCGTCAGATGTGTATAAGAGACAG  | ACT    | GCTTGAAGGATTTGCAATC   | 0.2                                                     |
| Myr_Fc_2                    | TCGTCGGCAGCGTCAGATGTGTATAAGAGACAGGCTTGAAGGATTTGTAATC        | TCGTCGGCAGCGTCAGATGTGTATAAGAGACAG  | GT     | GCTTGAAGGATTTGTAATC   | 0.05                                                    |
|                             |                                                             |                                    |        |                       | 1                                                       |
| <b>Myr Reverse Primers</b>  |                                                             |                                    |        |                       |                                                         |
| Myr_R_0                     | GTCTCGTGGGCTCGGAGATGTGTATAAGAGACAGACAAAGAGTAATCCATTTGCG     | GTCTCGTGGGCTCGGAGATGTGTATAAGAGACAG |        | ACAAAGAGTAATCCATTTGCG | 0.25                                                    |
| Myr_R_1                     | GTCTCGTGGGCTCGGAGATGTGTATAAGAGACAGGACAAAGAGTAATCCATTTGCG    | GTCTCGTGGGCTCGGAGATGTGTATAAGAGACAG | G      | ACAAAGAGTAATCCATTTGCG | 0.25                                                    |
| Myr_R_2                     | GTCTCGTGGGCTCGGAGATGTGTATAAGAGACAGCGACAAAGAGTAATCCATTTGCG   | GTCTCGTGGGCTCGGAGATGTGTATAAGAGACAG | CG     | ACAAAGAGTAATCCATTTGCG | 0.25                                                    |
| Myr_R_3                     | GTCTCGTGGGCTCGGAGATGTGTATAAGAGACAGAAAGACAAAGAGTAATCCATTTGCG | GTCTCGTGGGCTCGGAGATGTGTATAAGAGACAG | AAG    | ACAAAGAGTAATCCATTTGCG | 0.25                                                    |
|                             |                                                             |                                    |        |                       | 1                                                       |
| <b>PPYP Forward Primers</b> |                                                             |                                    |        |                       |                                                         |
| PPYP_Fa_0                   | TCGTCGGCAGCGTCAGATGTGTATAAGAGACAGACTCCAGCCTTTACCCCTAC       | TCGTCGGCAGCGTCAGATGTGTATAAGAGACAG  |        | ACTCCAGCCTTTACCCCTAC  | 0.1                                                     |
| PPYP_Fa_1                   | TCGTCGGCAGCGTCAGATGTGTATAAGAGACAGAACTCCAGCCTTTACCCCTAC      | TCGTCGGCAGCGTCAGATGTGTATAAGAGACAG  | A      | ACTCCAGCCTTTACCCCTAC  | 0.1                                                     |
| PPYP_Fb_0                   | TCGTCGGCAGCGTCAGATGTGTATAAGAGACAGATTCCAACCTTTACCCCTAC       | TCGTCGGCAGCGTCAGATGTGTATAAGAGACAG  |        | ATTCCAACCTTTACCCCTAC  | 0.2                                                     |
| PPYP_Fb_1                   | TCGTCGGCAGCGTCAGATGTGTATAAGAGACAGGATTCCAACCTTTACCCCTAC      | TCGTCGGCAGCGTCAGATGTGTATAAGAGACAG  | G      | ATTCCAACCTTTACCCCTAC  | 0.2                                                     |
| PPYP_Fb_2                   | TCGTCGGCAGCGTCAGATGTGTATAAGAGACAGTGTCCAACCTTTACCCCTAC       | TCGTCGGCAGCGTCAGATGTGTATAAGAGACAG  | TG     | ATTCCAACCTTTACCCCTAC  | 0.2                                                     |
| PPYP_Fb_3                   | TCGTCGGCAGCGTCAGATGTGTATAAGAGACAGCTTATCCAACCTTTACCCCTAC     | TCGTCGGCAGCGTCAGATGTGTATAAGAGACAG  | CTT    | ATTCCAACCTTTACCCCTAC  | 0.2                                                     |
|                             |                                                             |                                    |        |                       | 1                                                       |
| <b>PPYP Reverse Primers</b> |                                                             |                                    |        |                       |                                                         |
| PPYP_Ra_1                   | GTCTCGTGGGCTCGGAGATGTGTATAAGAGACAGGGTCTGATGCTGAGAATG        | GTCTCGTGGGCTCGGAGATGTGTATAAGAGACAG | G      | GGTCCGATGCTGAGAATG    | 0.04                                                    |
| PPYP_Rb_0                   | GTCTCGTGGGCTCGGAGATGTGTATAAGAGACAGGGTCCGATGCTGAGAATG        | GTCTCGTGGGCTCGGAGATGTGTATAAGAGACAG |        | GGTCCGATGCTGAGAATG    | 0.24                                                    |
| PPYP_Rb_1                   | GTCTCGTGGGCTCGGAGATGTGTATAAGAGACAGTGGTCCGATGCTGAGAATG       | GTCTCGTGGGCTCGGAGATGTGTATAAGAGACAG | T      | GGTCCGATGCTGAGAATG    | 0.24                                                    |
| PPYP_Rb_2                   | GTCTCGTGGGCTCGGAGATGTGTATAAGAGACAGTGGTCCGATGCTGAGAATG       | GTCTCGTGGGCTCGGAGATGTGTATAAGAGACAG | GT     | GGTCCGATGCTGAGAATG    | 0.24                                                    |
| PPYP_Rb_3                   | GTCTCGTGGGCTCGGAGATGTGTATAAGAGACAGAAAGGGCCGATGCTGAGAATG     | GTCTCGTGGGCTCGGAGATGTGTATAAGAGACAG | AAG    | GGTCCGATGCTGAGAATG    | 0.24                                                    |
|                             |                                                             |                                    |        |                       | 1                                                       |

**Supplementary Table 2c. Sequences of the PCR and qPCR primers used in this study to characterize and validate ERV locis and expression**

| <b>Amplification type</b>               | <b>Oligo 1</b>            | <b>Oligo 2</b>            |
|-----------------------------------------|---------------------------|---------------------------|
| Locus ERV type 1 validation1            | CTCTGGTTCCTTGCCCTGCTGAGCT | TGGTCAATGTATATGAGGCGCT    |
| qPCR Type1 ERV specific LTR             | GGGAATTGAGTCTGCTGTACCA    | ACAGAGTCTTTCAAATGAGGCG    |
| qPCR ref GAPDH                          | GCGACTTCAACAGTGA CTCCA    | TGAGGTCCACCACTCTGTTGCT    |
| qPCR Type2 ERV specific                 | GAATAAAAGGTCAGGGCGTTGG    | CTGACTTGGCTCTATCTTGGGT    |
| qPCR Type1 ERV specific Gag             | TGACGATATAAGCCACTTGA      | ACCCCAGACTATATTCAGATA     |
| qPCR Type1 ERV specific Env             | CTATGTGCTGCCCTCAAGGA      | GCCTCTCCCTAAGTTTGGCC      |
| Locus ERV type 1 validation2            | CTCTGGTTCCTTGCCCTGCTGAGCT | TAAGCCATTGGTGAAGGGTCA     |
| Locus ERV type 1 validation3            | CTCTGGTTCCTTGCCCTGCTGAGCT | TGACGATATAAGCCACTTGA      |
| Locus ERV type 1 validation4            | TTTTCTGGTGCCCTCTTGCCCTGG  | TAAGCCATTGGTGAAGGGTCA     |
| Locus ERV type 1 validation without ERV | CTCTGGTTCCTTGCCCTGCTGAGCT | TTGTGGAGCTGTGTGAGTGGTGG   |
| Locus ERV ETC386F validation            | GTGTGTGCGTCCCTGAATTTGCC   | GCGTGT CAGGATCTTTGGGGATGT |
| Locus ERV ETC506F validation            | AGGAAAAGAGTGTGCTTTGTTTGG  | ACAGGTCTTTGTCACCAGGCCAG   |

**Supplementary Table 3. Detection of CRISPR-mediated mutations in the group 1 type-C ERV mRNA sequences of edited CHO-K1 clones.**

| <b>Sample</b> | <b># screened clones</b> | <b># mutated clones</b> | <b>Mutation frequency</b> | <b>Loss-of-function mutation frequency<sup>1</sup></b> |
|---------------|--------------------------|-------------------------|---------------------------|--------------------------------------------------------|
| Myr2 sgRNA    | 95                       | 18                      | 19%                       | 11%                                                    |
| PPYP6 sgRNA   | 181                      | 14                      | 8%                        | 79%                                                    |
| Total         | 276                      | 32                      | 12%                       | 45%                                                    |

---

<sup>1</sup> Includes translation inhibition and frameshift mutations and is expressed relative to the number of mutated clones.

Supplementary Table 4. Analysis of repair junctions of edited CHO-K1 clones by Sanger sequencing of the expressed group 1 ERVs or by targeted Illumina DNA amplicon sequencing

| Analysis | mRNA | Clone | ID  | Locus | RefSeq     | MutSeq     | Type       | Insertion            | DelSeq     | InsSeq             | DelSize     | InsSize  | Length      | Index | MFLength | MFSeq | Connection | PercentageReads | NumberAles | altEJ     | altEJ     | SDMMEJ   | Effect                | Detected at mRNA level | Cluster                | ClusterGroup          | Predicted Cleavage |        |     |
|----------|------|-------|-----|-------|------------|------------|------------|----------------------|------------|--------------------|-------------|----------|-------------|-------|----------|-------|------------|-----------------|------------|-----------|-----------|----------|-----------------------|------------------------|------------------------|-----------------------|--------------------|--------|-----|
| Sanger   | mRNA | Mvr2  | C02 |       | 5'-TGTCAAT | 5'-TGTCAAT | Deletion   | TA                   |            |                    | 2           | 2        | 2           |       |          |       |            |                 |            | 1         | CNHEJ     |          | TranslationInhibition |                        |                        |                       |                    |        |     |
| Sanger   | mRNA | Mvr2  | D12 |       | 5'-CGACTC  | 5'-CGACTC  | Deletion   | TTCCCTCTGTGCGACTCT   |            |                    | 114         | 114      | 114         |       | 3        | CAA   |            |                 |            |           | 1         | altEJ    | MMEJ                  | TranslationInhibition  |                        |                       |                    |        |     |
| Sanger   | mRNA | Mvr2  | G09 |       | 5'-TCTTTGT | 5'-TCTTTGT | Deletion   | ATTTGTGCCTCCTAAG     |            |                    | 27          | 27       | 27          |       |          |       |            |                 |            |           | 1         | altEJ    | MMEJ                  | OutsideERVCodingRegion |                        |                       |                    |        |     |
| Sanger   | mRNA | Mvr2  | H02 |       | 5'-AGCTGT  | 5'-AGCTGT  | Deletion   | AAC                  |            |                    | 3           | 3        | 3           |       |          |       |            |                 |            |           | 1         | CNHEJ    |                       | OutsideERVCodingRegion |                        |                       |                    |        |     |
| Sanger   | mRNA | Mvr2  | A04 |       | 5'-CTCCTAA | 5'-CTCCTAA | Insertion  | Smaller5             |            | T                  |             | 1        | 1           | 1     |          |       |            |                 |            |           | 1         | CNHEJ    |                       | OutsideERVCodingRegion |                        |                       |                    |        |     |
| Sanger   | mRNA | Mvr2  | A09 |       | 5'-CTCCTAA | 5'-CTCCTAA | Insertion  | Smaller5             |            | T                  |             | 1        | 1           | 1     |          |       |            |                 |            |           | 1         | CNHEJ    |                       | OutsideERVCodingRegion |                        |                       |                    |        |     |
| Sanger   | mRNA | Mvr2  | A12 |       | 5'-CTCCTAA | 5'-CTCCTAA | Insertion  | Smaller5             |            | T                  |             | 1        | 1           | 1     |          |       |            |                 |            |           | 1         | CNHEJ    |                       | OutsideERVCodingRegion |                        |                       |                    |        |     |
| Sanger   | mRNA | Mvr2  | B05 |       | 5'-CTCCTAA | 5'-CTCCTAA | Insertion  | Smaller5             |            | T                  |             | 1        | 1           | 1     |          |       |            |                 |            |           | 1         | CNHEJ    |                       | OutsideERVCodingRegion |                        |                       |                    |        |     |
| Sanger   | mRNA | Mvr2  | B10 |       | 5'-CTCCTAA | 5'-CTCCTAA | Insertion  | Smaller5             |            | T                  |             | 1        | 1           | 1     |          |       |            |                 |            |           | 1         | CNHEJ    |                       | OutsideERVCodingRegion |                        |                       |                    |        |     |
| Sanger   | mRNA | Mvr2  | B11 |       | 5'-CTCCTAA | 5'-CTCCTAA | Insertion  | Smaller5             |            | T                  |             | 1        | 1           | 1     |          |       |            |                 |            |           | 1         | CNHEJ    |                       | OutsideERVCodingRegion |                        |                       |                    |        |     |
| Sanger   | mRNA | Mvr2  | C06 |       | 5'-CTCCTAA | 5'-CTCCTAA | Insertion  | Smaller5             |            | T                  |             | 1        | 1           | 1     |          |       |            |                 |            |           | 1         | CNHEJ    |                       | OutsideERVCodingRegion |                        |                       |                    |        |     |
| Sanger   | mRNA | Mvr2  | C07 |       | 5'-CTCCTAA | 5'-CTCCTAA | Insertion  | Smaller5             |            | T                  |             | 1        | 1           | 1     |          |       |            |                 |            |           | 1         | CNHEJ    |                       | OutsideERVCodingRegion |                        |                       |                    |        |     |
| Sanger   | mRNA | Mvr2  | D06 |       | 5'-CTCCTAA | 5'-CTCCTAA | Insertion  | Smaller5             |            | T                  |             | 1        | 1           | 1     |          |       |            |                 |            |           | 1         | CNHEJ    |                       | OutsideERVCodingRegion |                        |                       |                    |        |     |
| Sanger   | mRNA | Mvr2  | E07 |       | 5'-CTCCTAA | 5'-CTCCTAA | Insertion  | Smaller5             |            | T                  |             | 1        | 1           | 1     |          |       |            |                 |            |           | 1         | CNHEJ    |                       | OutsideERVCodingRegion |                        |                       |                    |        |     |
| Sanger   | mRNA | Mvr2  | E11 |       | 5'-CTCCTAA | 5'-CTCCTAA | Insertion  | Smaller5             |            | T                  |             | 1        | 1           | 1     |          |       |            |                 |            |           | 1         | CNHEJ    |                       | OutsideERVCodingRegion |                        |                       |                    |        |     |
| Sanger   | mRNA | Mvr2  | F11 |       | 5'-CTCCTAA | 5'-CTCCTAA | Insertion  | Smaller5             |            | T                  |             | 1        | 1           | 1     |          |       |            |                 |            |           | 1         | CNHEJ    |                       | OutsideERVCodingRegion |                        |                       |                    |        |     |
| Sanger   | mRNA | Mvr2  | F12 |       | 5'-CTCCTAA | 5'-CTCCTAA | Insertion  | Smaller5             |            | T                  |             | 1        | 1           | 1     |          |       |            |                 |            |           | 1         | CNHEJ    |                       | OutsideERVCodingRegion |                        |                       |                    |        |     |
| Sanger   | mRNA | PPY6  | A02 |       | 5'-CCATATC | 5'-CCATATC | Indel      | Templated            | CACCAG AG  | ACTGCTTC           | 20          | 10       | 10          | -10   |          |       |            |                 |            |           | 1         | HR altEJ | SDMMEJ                | Unknown                | Frameshift             |                       |                    |        |     |
| Sanger   | mRNA | PPY6  | A07 |       | 5'-CCCCCG  | 5'-CCCCCG  | Deletion   | CCAGAGG              |            |                    | 7           | 7        | 7           | -7    |          | 2     | CA         |                 |            |           |           | Unknown  |                       | Frameshift             |                        |                       |                    |        |     |
| Sanger   | mRNA | PPY6  | B11 |       | 5'-CGCCAT  | 5'-CGCCAT  | Insertion  | Smaller5             |            | C                  |             | 1        | 1           | 1     |          |       |            |                 |            |           | 1         | CNHEJ    |                       | Frameshift             |                        |                       |                    |        |     |
| Sanger   | mRNA | PPY6  | D10 |       | 5'-CGCCAT  | 5'-CGCCAT  | Insertion  | Smaller5             |            | C                  |             | 1        | 1           | 1     |          |       |            |                 |            |           | 1         | CNHEJ    |                       | Frameshift             |                        |                       |                    |        |     |
| Sanger   | mRNA | PPY6  | K7  |       | 5'-CGCCAT  | 5'-CGCCAT  | Insertion  | Smaller5             |            | C                  |             | 1        | 1           | 1     |          |       |            |                 |            |           | 1         | CNHEJ    |                       | Frameshift             |                        |                       |                    |        |     |
| Sanger   | mRNA | PPY6  | D08 |       | 5'-GGAGAA  | 5'-GGAGAA  | Deletion   | CACCAGAGG            |            |                    | 9           | 9        | 9           | -9    |          |       |            |                 |            |           | 1         | altEJ    | MMEJ                  | InFrameMutation        |                        |                       |                    |        |     |
| Sanger   | mRNA | PPY6  | E10 |       | 5'-AGCCCC  | 5'-AGCCCC  | Deletion   | TCCGCGACTGCGCCCG     | 37         |                    |             | 37       | 37          | -37   |          |       |            |                 |            |           | 1         | altEJ    | MMEJ                  | Frameshift             |                        |                       |                    |        |     |
| Sanger   | mRNA | PPY6  | G12 |       | 5'-CCCCCG  | 5'-CCCCCG  | Deletion   | CCA                  |            |                    | 3           | 3        | 3           | -3    |          | 3     | CCA        |                 |            |           | 1         | altEJ    | MMEJ                  | SDMMEJ                 | LoopOut                | InFrameMutation       |                    |        |     |
| Sanger   | mRNA | PPY6  | H03 |       | 5'-CCCCCG  | 5'-CCCCCG  | Deletion   | CCA                  |            |                    | 3           | 3        | 3           | -3    |          | 3     | CCA        |                 |            |           | 1         | altEJ    | MMEJ                  | SDMMEJ                 | LoopOut                | InFrameMutation       |                    |        |     |
| Sanger   | mRNA | PPY6  | K03 |       | 5'-ATATCC  | 5'-ATATCC  | Deletion   | CGCCCCCACCAGAGCAGAGG |            |                    | 22          | 22       | 22          | -22   |          | 2     | GC         |                 |            |           | 1         | altEJ    | MMEJ                  | SDMMEJ                 | SnapBack               | Frameshift            |                    |        |     |
| Sanger   | mRNA | PPY6  | K09 |       | 5'-CCCCCG  | 5'-CCCCCG  | Deletion   | C                    |            |                    | 1           | 1        | 1           | -1    |          |       |            |                 |            |           | 1         | CNHEJ    |                       | Frameshift             |                        |                       |                    |        |     |
| Sanger   | mRNA | PPY6  | K19 |       | 5'-CCCCCG  | 5'-CCCCCG  | Deletion   | C                    |            |                    | 1           | 1        | 1           | -1    |          |       |            |                 |            |           | 1         | CNHEJ    |                       | Frameshift             |                        |                       |                    |        |     |
| Sanger   | mRNA | PPY6  | K12 |       | 5'-TTAACGG | 5'-TTAACGG | Indel      | Smaller5             | CAG A      |                    | 3           | 12       | -2          |       |          |       |            |                 |            |           | 1         | Unknown  |                       | Frameshift             |                        |                       |                    |        |     |
| Sanger   | mRNA | PPY6  | K14 |       | 5'-AGGAGC  | 5'-AGGAGC  | Deletion   | GCCCCCACCAGAG        |            |                    | 13          | 13       | 13          | -13   |          | 2     | GC         |                 |            |           | 1         | altEJ    | MMEJ                  | SDMMEJ                 | LoopOut                | Frameshift            |                    |        |     |
| Illumina | DNA  | Mvr2  | C02 | 1     | 1          | 1          | 5'-TTGTAGG | 5'-TTGTAGG           | Insertion  | Smaller5           |             | T        | 1           | 1     | 1        |       |            | NA              | 0.2722458  | 1         | 1         | CNHEJ    |                       | OutsideERVCodingRegion | Cluster16              | Group1                | yes                |        |     |
| Illumina | DNA  | Mvr2  | C02 | 3     | 9          | 2          | 5'-GTGATT  | 5'-GTGATT            | Indel      | Templated          | A           | GTACCAC  | 1           | 8     | 7        | 7     |            |                 | NA         | 0.3008392 | 1         | altEJ    | SDMMEJ                | LoopOut                | TranslationInhibition  | Cluster21             | Group1             | yes    |     |
| Illumina | DNA  | Mvr2  | C02 | 4     | 7          | 3          | 5'-TTGTAGG | 5'-TTGTAGG           | Deletion   | AAACTATGGGG        |             | 12       | 12          | 12    | -12      |       | 5          | AACT            | 0.3306494  | 1         | altEJ     | MMEJ     |                       | TranslationInhibition  | Cluster21              | Group1                | yes                |        |     |
| Illumina | DNA  | Mvr2  | C02 | 0     | 1          | 4          | 5'-TTGTAGG | 5'-TTGTAGG           | Deletion   | TA                 |             | 2        | 1           | 1     | 1        |       |            | NA              | 0.347398   | 1         | 1         | CNHEJ    |                       | TranslationInhibition  | Cluster21              | Group1                | yes                |        |     |
| Illumina | DNA  | Mvr2  | D12 | 1     | 1          | 1A         | 5'-CGGTCT  | 5'-CGGTCT            | Insertion  | Smaller5           |             | T        | 1           | 1     | 1        |       |            | NA              | 0.8389501  | 3         | 1         | CNHEJ    |                       | OutsideERVCodingRegion | Cluster8               | Group1                | yes                |        |     |
| Illumina | DNA  | Mvr2  | D12 | 1     | 1          | 1B         | 5'-CGGTCT  | 5'-CGGTCT            | Insertion  | Smaller5           |             | T        | 1           | 1     | 1        |       |            | NA              | 0.8389501  | 3         | 1         | CNHEJ    |                       | OutsideERVCodingRegion | Cluster16              | Group1                | yes                |        |     |
| Illumina | DNA  | Mvr2  | D12 | 1     | 1          | 1C         | 5'-CGGTCT  | 5'-CGGTCT            | Insertion  | Smaller5           |             | T        | 1           | 1     | 1        |       |            | NA              | 0.8389501  | 3         | 1         | CNHEJ    |                       | OutsideERVCodingRegion | Cluster21              | Group1                | yes                |        |     |
| Illumina | DNA  | Mvr2  | D12 | 1     | 17         | 2          | 5'-TTGTAGG | 5'-TTGTAGG           | Indel      | Templated          | CT          | TAGGCTTA | 2           | 19    | 17       | 17    |            |                 | NA         | 0.3176807 | 1         | HR altEJ | SDMMEJ                | SnapBack               | OutsideERVCodingRegion | Cluster18             | Group1             | yes    |     |
| Illumina | DNA  | Mvr2  | D12 | 13    | 14         | 3          | 1          | 5'-TTGTAGG           | 5'-TTGTAGG | Deletion           | AAACTATGGGG |          | 12          | 2     | 2        |       |            | 5               | AACT       | D12 3 2   | 0.3632735 | 1        | altEJ                 | MMEJ                   | TranslationInhibition  | Cluster17             | Group1             | yes    |     |
| Illumina | DNA  | Mvr2  | D12 | 13    | 14         | 3          | 2          | 5'-TTGTAGG           | 5'-TTGTAGG | Deletion           | AAACTATGGGG |          | 12          | 2     | 2        |       |            | 5               | AACT       | D12 3 1   | 0.3632735 | 1        | HR altEJ              | SDMMEJ                 | LoopOut                | TranslationInhibition | Cluster17          | Group1 | yes |
| Illumina | DNA  | Mvr2  | D12 | -107  | 6          | 4          | 5'-CGACTC  | 5'-CGACTC            | Deletion   | TTCCCTCTGTGCGACTCT | 114         | 114      | 114         | -114  |          | 3     | CAA        |                 | NA         | 0.3111448 | 1         | altEJ    | MMEJ                  | TranslationInhibition  | Cluster21              | Group1                | yes                |        |     |
| Illumina | DNA  | Mvr2  | D12 | -23   | -1         | 5          | 5'-AAGTCT  | 5'-AAGTCT            | Deletion   | GTGCTCCTCCAAAGCTA  | 23          | 23       | 23          | -23   |          |       |            | NA              | 0.2920035  | 1         | altEJ     | SDMMEJ   | LoopOut               | OutsideERVCodingRegion | Cluster19              | Group1                | yes                |        |     |
| Illumina | DNA  | Mvr2  | D12 | 62    | 111        | 6          | 1          | 5'-TTGTAGG           | 5'-TTGTAGG | Deletion           | TAGA AACT   | 8        | 42          | 42    |          |       |            |                 | NA         | 0.292818  | 1         | Unknown  |                       | InFrameMutation        | Cluster21              | Group1                | yes                |        |     |
| Illumina | DNA  | Mvr2  | D12 | -7    | 0          | 6          | 2          | 5'-TTGTAGG           | 5'-TTGTAGG | Insertion          | Templated   | trans    | TGTCACCCTCT | 50    | 42       | 42    |            |                 |            | NA        | 0.292818  | 1        | HR altEJ              | SDMMEJ                 | LoopOut                | InFrameMutation       | Cluster21          | Group1 | yes |
| Illumina | DNA  | Mvr2  | D12 | -3    | 27         | 7          | 5'-CTTTGTG | 5'-CTTTGTG           | Deletion   | AACTATGGGCAAACTG   | 31          | 31       | 31          | -31   |          |       |            | NA              | 0.6756399  | 2         | altEJ     | SDMMEJ   | SnapBack              | TranslationInhibition  | Cluster21              | Group1                | yes                |        |     |
| Illumina | DNA  | Mvr2  | D12 | -3    | 27         | 7          | 5'-CTTTGTG | 5'-CTTTGTG           | Deletion   | AACTATGGGCAAACTG   | 31          | 31       | 31          | -31   |          |       |            | NA              | 0.6756399  | 2         | altEJ     | SDMMEJ   | SnapBack              | TranslationInhibition  | Cluster21              | Group1                | yes                |        |     |
| Illumina | DNA  | Mvr2  | G09 | 1     | 1          | 1A         | 5'-CGGTCT  | 5'-CGGTCT            | Insertion  | Smaller5           |             | T        | 1           | 1     | 1        |       |            | NA              | 2.5733213  | 8         | 1         | CNHEJ    |                       | OutsideERVCodingRegion | Cluster21              | Group1                | yes                |        |     |
| Illumina | DNA  | Mvr2  | G09 | 1     | 1          | 1A         | 5'-CGGTCT  | 5'-CGGTCT            | Insertion  | Smaller5           |             | T        | 1           | 1     | 1        |       |            | NA              | 2.5733213  | 8         | 1         | CNHEJ    |                       | OutsideERVCodingRegion | Cluster21              | Group1                | yes                |        |     |
| Illumina | DNA  | Mvr2  | G09 | 1     | 1          | 1A         | 5'-CGGTCT  | 5'-CGGTCT            | Insertion  | Smaller5           |             | T        | 1           | 1     | 1        |       |            | NA              | 2.5733213  | 8         | 1         | CNHEJ    |                       | OutsideERVCodingRegion | Cluster21              | Group1                | yes                |        |     |
| Illumina | DNA  | Mvr2  | G09 | 1     | 1          | 1A         | 5'-CGGTCT  | 5'-CGGTCT            | Insertion  | Smaller5           |             | T        | 1           | 1     | 1        |       |            | NA              | 2.5733213  | 8         | 1         | CNHEJ    |                       | OutsideERVCodingRegion | Cluster21              | Group1                | yes                |        |     |
| Illumina | DNA  | Mvr2  | G09 | 1     | 1          | 1B         | 5'-CGGTCT  | 5'-CGGTCT            | Insertion  | Smaller5           |             | T        | 1           | 1     | 1        |       |            | NA              | 2.5733213  | 8         | 1         | CNHEJ    |                       | OutsideERVCodingRegion | Cluster17              | Group1                | yes                |        |     |
| Illumina | DNA  | Mvr2  | G09 | 1     | 1          | 1C         | 5'-CGGTCT  | 5'-CGGTCT            | Insertion  | Smaller5           |             | T        | 1           | 1     | 1        |       |            | NA              | 2.5733213  | 8         | 1         | CNHEJ    |                       | OutsideERVCodingRegion | Cluster15              | Group1                | yes                |        |     |
| Illumina | DNA  | Mvr2  | G09 | 1     | 1          | 1D         | 5'-CGGTCT  | 5'-CGGTCT            | Insertion  | Smaller5           |             | T        | 1           | 1     | 1        |       |            | NA              | 2.5733213  | 8         | 1         | CNHEJ    |                       | OutsideERVCodingRegion | Cluster8               | Group1                | yes                |        |     |
| Illumina | DNA  | Mvr2  | G09 | 1     | 1          | 1E         | 5'-CGGTCT  | 5'-CGGTCT            | Insertion  | Smaller5           |             | T        | 1           | 1     | 1        |       |            | NA              | 2.5733213  | 8         | 1         | CNHEJ    |                       | OutsideERVCodingRegion | Cluster4               | Group1                | yes                |        |     |
| Illumina | DNA  | Mvr2  | G09 | -33   | 8          | 2          | 5'-TGTCTG  | 5'-TGTCTG            | Deletion   | ACTGTGATTTGCGCCT   |             |          |             |       |          |       |            |                 |            |           |           |          |                       |                        |                        |                       |                    |        |     |

Supplementary Table S5. Sequence analysis of the expressed mRNA ERV sequences of mutated CHO-K1 clones.

| Clone <sup>1</sup>       |          | Sequence <sup>2</sup>                                                                                                                               | Features <sup>3</sup>          | Mutation type <sup>4</sup>      | Repair pathway <sup>5</sup> | Pattern score <sup>6</sup> | FORECasT <sup>7</sup> |
|--------------------------|----------|-----------------------------------------------------------------------------------------------------------------------------------------------------|--------------------------------|---------------------------------|-----------------------------|----------------------------|-----------------------|
| <b>Myr2 sgRNA (n=18)</b> |          |                                                                                                                                                     |                                |                                 |                             |                            |                       |
| C02                      | Genomic  | 5' -TGTCATTTGTGCCCTCCTAAGCCTAGAAAC TATG GGG CAAACTGTC<br>ACCACCTCCTTTGTCCCTAACACTCTCCCACTGGAA-3'                                                    | 2 bp deletion,<br>1 bp MH      | Translation<br>inhibition       | C-NHEJ                      | -                          | 2.6%                  |
|                          | Junction | 5' -TGTCATTTGTGCCCTCCTAAGCCTAGAAAC--TG GGG CAAACTGTC<br>ACCACCTCCTTTGTCCCTAACACTCTCCCACTGGAA-3'                                                     |                                |                                 |                             |                            |                       |
| D12                      | Genomic  | 5' -CGACTCTCTCT CAATTCCT-75bp-GAAAC TATG GGG CAAACTGTC<br>ACCACCTCCTTTGT-3'                                                                         | 114 bp<br>deletion, 3 bp<br>MH | Translation<br>inhibition       | MMEJ                        | NA                         | -                     |
|                          | Junction | 5' -CGACTCTCTCT CAA-----95bp-----ACTGTC<br>ACCACCTCCTTTGT-3'                                                                                        |                                |                                 |                             |                            |                       |
| G09                      | Genomic  | 5' -TCTTTGTCTTGTAGCTGTC ATTTGTGCCCTCCTAAGCCTAGAAAC T<br>ATG GGG CAAACTGTCACCACCTCCTTTGTCCCTAACACTCTCCCACTGGA<br>AAGATGTACAGGAATATGCTCATAACCAATCT-3' | 27 bp<br>deletion, 2 bp<br>MH  | Outside<br>ERV coding<br>region | MMEJ                        | 51.8                       | -                     |
|                          | Junction | 5' -TCTTTGTCTTGTAGCTGTC-----<br>ATG GGG CAAACTGTCACCACCTCCTTTGTCCCTAACACTCTCCCACTGGA<br>AAGATGTACAGGAATATGCTCATAACCAATCT-3'                         |                                |                                 |                             |                            |                       |
| H02                      | Genomic  | 5' -AGCTGTCATTTGTGCCCTCCTAAGCCTAGAAAC TATG GGG CAAACT<br>GTCACCACCTCCTTTGTCCC-3'                                                                    | 3 bp deletion,<br>no MH        | Outside<br>ERV coding<br>region | C-NHEJ                      | -                          | -                     |
|                          | Junction | 5' -AGCTGTCATTTGTGCCCTCCTAAGCCTAGA---TATG GGG CAAACT<br>GTCACCACCTCCTTTGTCCC-3'                                                                     |                                |                                 |                             |                            |                       |
| A04<br>(n=14)            | Genomic  | 5' -CTCCTAAGCCTAGAAAC T-ATG GGG CAAACTGTCACCACCTCC-3'                                                                                               | 1 bp<br>insertion, 1<br>bp MH  | Outside<br>ERV coding<br>region | C-NHEJ <sup>8</sup>         | -                          | 17.8%                 |
|                          | Junction | 5' -CTCCTAAGCCTAGAAACT TATG GGG CAAACTGTCACCACCTCC-3'                                                                                               |                                |                                 |                             |                            |                       |

| PPYP6 sgRNA (n=14) |          |                                                                                                           |                                                                                                                                                                                |                        |                      |       |      |
|--------------------|----------|-----------------------------------------------------------------------------------------------------------|--------------------------------------------------------------------------------------------------------------------------------------------------------------------------------|------------------------|----------------------|-------|------|
| A02                | Genomic  | 5' -CCC CCGCCATATCCGCCACTGCCGCCCC CA CAGAGGCAGAAGCGG<br>ACTCCGCCGCTGCCTTGGCGGAAGC -3'                     | Deletion +<br>Insertion<br>(Replace-<br>ment of 20 bp<br>with 10 bp;<br>net=10 bp<br>deletion);<br>inverted<br>templated<br>insertion from<br>three<br>possible ERV<br>alleles | Frameshift<br>mutation | HR                   | -     | -    |
|                    | Junction | 5' -CCC CCGCCATATCCGCCACTGCCGCCCC ACTGCTTCTG-----<br>--TCCGCCGCTGCCTTGGCGGAAGC -3'                        |                                                                                                                                                                                |                        |                      |       |      |
| A07                | Genomic  | 5' -CCC CCGCCATATCCGCCACTGCCGCCCC CACCAGAGGCAGAAGCGG<br>ACTCCGCCGCTGCCTTGGC -3'                           | 7 bp deletion,<br>2 bp MH<br>flanking DSB                                                                                                                                      | Frameshift<br>mutation | Unknown <sup>9</sup> | -     | 1.1% |
|                    | Junction | 5' -CCC CCGCCATATCCGCCACTGCCGCCCCA-----CAGAAGCGG<br>ACTCCGCCGCTGCCTTGGC -3'                               |                                                                                                                                                                                |                        |                      |       |      |
| B11<br>(n=3)       | Genomic  | 5' -CCC CCGCCATATCCGCCACTGCCGCCCCA C-CAGAGGCAGAAGCG<br>GACTCCGCCGCTGCCTTGGC -3'                           | 1 bp<br>insertion, 1<br>bp MH                                                                                                                                                  | Frameshift<br>mutation | C-NHEJ <sup>8</sup>  | -     | 3.1% |
|                    | Junction | 5' -CCC CCGCCATATCCGCCACTGCCGCCCCAC CAGAGGCAGAAGCG<br>GACTCCGCCGCTGCCTTGGC -3'                            |                                                                                                                                                                                |                        |                      |       |      |
| D08                | Genomic  | 5' -GGAGAAGACCAGTTGGTTGATCTATTAACGGAGGAGCCCC CCGCCA<br>TATCCGCCACTGCCGCCCC CACCAGAGGCAGAAGCGGACTCCGCC -3' | 9 bp deletion,<br>2 bp MH                                                                                                                                                      | In-frame<br>mutation   | MMEJ                 | 191.4 | 2%   |
|                    | Junction | 5' -GGAGAAGACCAGTTGGTTGATCTATTAACGGAGGAGCCCC CCGCCA<br>TATCCGCCACTGCCGCCCC-----CAGAAGCGGACTCCGCC -3'      |                                                                                                                                                                                |                        |                      |       |      |
| E10                | Genomic  | 5' -AGCCC CCGCCATA TCCGCCACTGCCGCCCCA C CAGAGGCAGAAGC<br>GGACTCCGCCGCTGCCTTGC -3'                         |                                                                                                                                                                                |                        | MMEJ                 | 172.7 | -    |



|              |          |                                                                                                                             |                                                                          |                     |                             |       |       |
|--------------|----------|-----------------------------------------------------------------------------------------------------------------------------|--------------------------------------------------------------------------|---------------------|-----------------------------|-------|-------|
|              | Junction | 5' -AGCCC <u>CCGCCATATCCGCC</u> -----<br>-----GCTGCCTTG-3'                                                                  | 37 bp deletion, 6 bp MH                                                  | Frameshift mutation |                             |       |       |
| G12<br>(n=2) | Genomic  | 5' -CCC <u>CCGCCATATCCGCC</u> ACTGCCGCC <u>CCAC</u> AGAGGCAGAAGCGG<br>ACTCCGCCGCTGCCTTGGC-3'                                | 3 bp deletion, 3 bp MH or 4 bp MH (4 bp downstream)                      | In-frame mutation   | MMEJ or SD-MMEJ (loop-out)  | 258.3 | 14.8% |
|              | Junction | 5' -CCC <u>CCGCCATATCCGCC</u> ACTGCCGCC <u>CCA</u> --- <u>GAGGC</u> AGAAGCGG<br>ACTCCGCCGCTGCCTTGGC-3'                      |                                                                          |                     |                             |       |       |
| K3           | Genomic  | 5' -CCC <u>CCGCCATATCCGCC</u> ACTGCCGCC <u>CCAC</u> AGAGGCAGAAGCGG<br>ACTCCGCCGCTGCCTTGCGGAAGCGG-3'                         | 22 bp deletion, 2 bp MH or 5 bp MH (6 bp upstream)                       | Frameshift mutation | MMEJ or SD-MMEJ (snap-back) | 133.1 | -     |
|              | Junction | 5' -CCC <u>CCGCCATATCCGCC</u> ACTGCC-----GG<br><u>ACTCCGCCGCTGCCTTGCGGAAGCGG</u> -3'                                        |                                                                          |                     |                             |       |       |
| K9<br>(n=2)  | Genomic  | 5' -CCC <u>CCGCCATATCCGCC</u> ACTGCCGCC <u>CCAC</u> AGAGGCAGAAGCGG<br>ACTCCGCCGCTGCC-3'                                     | 1 bp deletion, 1 bp MH                                                   | Frameshift mutation | C-NHEJ                      | -     | 19.5% |
|              | Junction | 5' -CCC <u>CCGCCATATCCGCC</u> ACTGCCGCC <u>C</u> -AGAGGCAGAAGCGG<br>ACTCCGCCGCTGCC-3'                                       |                                                                          |                     |                             |       |       |
| K12          | Genomic  | 5' -TTAACGGAGGAGCCC <u>CCGCCATATCCGCC</u> ACTGCCGCC <u>CCAC</u> AGAGGCAGAAGCGGACTCCGC-3'                                    | Deletion + Insertion (Replacement of 3 bp with 1 bp; net= 2 bp deletion) | Frameshift mutation | Unknown                     | -     | -     |
|              | Junction | 5' -TTAACGGAGGAGCCC <u>CCGCCATATCCGCC</u> ACTGCCGCC <u>C</u> --- <u>A</u> AGGCAGAAGCGGACTCCGC-3'                            |                                                                          |                     |                             |       |       |
| K14          | Genomic  | 5' -AGGAGCCC <u>CCGCCATATCCGCC</u> ACTGCCGCC <u>CCAC</u> AGAGGCAGAAGCGGACTCCC <u>CCGCCATATCCGCC</u> GGAAGCGGCCCTTGACCCTT-3' | 13 bp deletion, 2 bp MH                                                  | Frameshift mutation |                             | 208.8 | -     |

|  |          |                                                                                                       |                                        |  |                                  |  |  |
|--|----------|-------------------------------------------------------------------------------------------------------|----------------------------------------|--|----------------------------------|--|--|
|  | Junction | 5' -AGGAGCCC <b>CCGCCATATCCGCC</b> ACTGCC-----GCAGA<br>AGCGGACTCCGCCGCTGCCTTGGCGGAAGCGGCCCTGACCCTT-3' | MH or 5 bp<br>MH (15 bp<br>downstream) |  | MMEJ or<br>SD-MMEJ<br>(loop-out) |  |  |
|--|----------|-------------------------------------------------------------------------------------------------------|----------------------------------------|--|----------------------------------|--|--|

<sup>1</sup> The table shows mRNA Sanger sequencing data of the expressed ERV repair junctions of CHO-K1 clones treated with wild-type Cas9 nuclease and the Myr2 or PPYP6 sgRNAs. The sequences are derived from Sanger sequencing of cDNA PCR amplicons. If the same repair junction was detected more than once, the number is indicated below each sample name as (n=). The lines above each mutated sequence termed 'Genomic' indicates the corresponding unmutated CHO-K1 cell genome sequence.

<sup>2</sup> Predicted blunt-ended DSB sites induced by the two sgRNAs and the wild-type Cas9 nuclease are highlighted in yellow, PAM sites are shown in bold blue, and the ATG translation initiation codon is depicted in brown letters. Myr and PPYP target motifs are highlighted in turquoise and purple, respectively. Pre-existing microhomologies (MH) of the microhomology-mediated end-joining (MMEJ) repair mechanism are shown in bold green, while *de novo* MH of the synthesis-dependent microhomology-mediated end-joining (SD-MMEJ) mechanism are underlined with a double line. Inserted bases are represented in bold red letters, deleted bases with a "-" sign, and replacements in italic underlined with a single bold line.

<sup>3</sup> Size of mutation and MH length (in bp). The distance between priming site and the break site for *de novo* MH are shown in parenthesis.

<sup>4</sup> ERV mutation types include in-frame mutations, out-of-frame mutations, translation inhibition (mutation of the ATG translation initiation codon) or mutations locating outside of the ERV coding region. Out-of-frame mutations and translation inhibition are likely, while in-frame mutations and mutations outside of the coding region are less likely to influence ERV expression and VLP formation.

<sup>5</sup> Most probable DSB repair mechanism based on manual junction analysis. Possible repair mechanisms include C-NHEJ, MMEJ, SD-MMEJ (snap-back), SD-MMEJ (loop-out), single strand annealing (SSA), homologous recombination (HR), and unknown. For snap-back SD-MMEJ mechanism, *de novo* priming sites are inverted repeats, while loop-out SD-MMEJ mechanisms uses priming sites with direct repeats (Khodaverdian et al., 2017). If the observed junction sequence is compatible with more than one mechanism and both appear equally likely, all potential pathways are listed. Junctions were verified for homologies at break site and templated insertions (SD-MMEJ) using program described in (Schimmel et al., 2017).

<sup>6</sup> Score of each repair pattern according to the MH size and the deletion length. Pattern score was calculated using the RGenome "Microhomology-Predictor" tool (<http://www.rgenome.net/mich-calculator/>) described in (Bae et al., 2014). The higher the score, the more likely the predicted mutation should be observed. The pattern score is only valid for repair junctions having MHs at the break site (MMEJ-mediated repair). NA: not available.

<sup>7</sup> Predicted frequencies of CRISPR-Cas9 editing outcomes using the online tool FORECasT (Favoured Outcomes of Repair Events at Cas9 Targets; <https://partslab.sanger.ac.uk/FORECasT>) as described in (Allen et al., 2018). The higher the frequency, the more junctions are expected to contain the predicted mutation pattern. Only the frequencies of the predicted ten most frequent mutations are listed.

<sup>8</sup> Frequent 1 bp insertions consisting of a duplication of the 4th nucleotide were also observed previously (Lemos et al., 2018)

<sup>9</sup> Unknown mechanism but similar junction pattern was described in (Shin et al., 2017)

Myr

Supplementary Table 6a. Cluster analysis of the Myr motif flanking sequences of the CHO type-C ERVs following genomic DNA Illumina deep sequencing.

| Myr       | Illumina deep sequencing |                |                      |                                | Whole genome reference |            |                      |                               |
|-----------|--------------------------|----------------|----------------------|--------------------------------|------------------------|------------|----------------------|-------------------------------|
|           | Cluster                  | Absolute reads | % reads <sup>1</sup> | Predicted CRISPR-Cas9 cleavage | Presence of Myr motif  | ERV number | % reads <sup>1</sup> | Type-C ERV group <sup>2</sup> |
| Cluster1  | 16911                    | 4.5            |                      |                                | yes                    | 3          | 3                    | Group2                        |
| Cluster2  | 30056                    | 8.0            |                      |                                | yes                    | 7          | 6                    | Group1                        |
| Cluster3  | 1674                     | 0.4            |                      |                                | yes                    | 1          | 1                    | Group2                        |
| Cluster4  | 3304                     | 0.9            | yes                  |                                | yes                    | 2          | 2                    | Group1                        |
| Cluster5  | 6775                     | 1.8            | yes                  |                                | yes                    | 3          | 3                    | Group1                        |
| Cluster6  | 3330                     | 0.9            |                      |                                | yes                    | 1          | 1                    | Group1                        |
| Cluster7  | 2074                     | 0.6            |                      |                                | yes                    | 1          | 1                    | Group2                        |
| Cluster8  | 6383                     | 1.7            | yes                  |                                | yes                    | 3          | 3                    | Group1                        |
| Cluster9  | 6260                     | 1.7            | yes                  |                                | yes                    | 3          | 3                    | Group1                        |
| Cluster10 | 4503                     | 1.2            | yes                  |                                | yes                    | 2          | 2                    | Group1                        |
| Cluster11 | 3869                     | 1.0            |                      |                                | yes                    | 2          | 2                    | Group2                        |
| Cluster12 | 3578                     | 1.0            |                      |                                | yes                    | 0          | 0                    | Group2                        |
| Cluster13 | 6480                     | 1.7            |                      |                                | yes                    | 1          | 1                    | Group2                        |
| Cluster14 | 2673                     | 0.7            |                      |                                | yes                    | 1          | 1                    | Group1                        |
| Cluster15 | 10236                    | 2.7            | yes                  |                                | yes                    | 4          | 4                    | Group1                        |
| Cluster16 | 16877                    | 4.5            | yes                  |                                | yes                    | 9          | 8                    | Group1                        |
| Cluster17 | 9703                     | 2.6            | yes                  |                                | yes                    | 4          | 4                    | Group1                        |
| Cluster18 | 2465                     | 0.7            | yes                  |                                | yes                    | 1          | 1                    | Group1                        |
| Cluster19 | 1976                     | 0.5            | yes                  |                                | yes                    | 1          | 1                    | Group1                        |
| Cluster20 | 2677                     | 0.7            | yes                  |                                | yes                    | 1          | 1                    | Group1                        |
| Cluster21 | 136722                   | 36.3           | yes                  |                                | yes                    | 33         | 30                   | Group1                        |
| Cluster22 | 2348                     | 0.6            | yes                  |                                | yes                    | 1          | 1                    | Group1                        |
| Cluster23 | 1603                     | 0.4            |                      |                                | yes                    | 3          | 3                    | Group1                        |
| Cluster24 | 1231                     | 0.3            |                      |                                | yes                    | 0          | 0                    | Group1                        |
| Cluster25 | 1559                     | 0.4            |                      |                                | yes                    | 0          | 0                    | Group3                        |
| Cluster26 | 1345                     | 0.4            |                      |                                | yes                    | 1          | 1                    | Group3                        |
| Cluster27 | 16035                    | 4.3            |                      |                                | yes                    | 2          | 2                    | Group3                        |
| Cluster28 | 1403                     | 0.4            |                      |                                | yes                    | 3          | 3                    | Group3                        |
| Cluster29 | 1897                     | 0.5            |                      |                                | yes                    | 0          | 0                    | Group3                        |
| Cluster30 | 28691                    | 7.6            |                      |                                | yes                    | 11         | 10                   | Group3                        |
| Cluster31 | 1526                     | 0.4            |                      |                                | yes                    | 1          | 1                    | Group3                        |
| Cluster32 | 3274                     | 0.9            |                      |                                |                        | 2          | 2                    | Group3                        |
| Cluster33 | 3787                     | 1.0            |                      |                                | yes                    | 1          | 1                    | Group3                        |
| Cluster34 | 2003                     | 0.5            |                      |                                | yes                    | 1          | 1                    | Group3                        |
| Total     | 376471                   | 92             | 13                   |                                | 33                     | 109        | 100                  |                               |

<sup>1</sup> Illumina Gag sequence clusters are compared to the CHO whole genome reference assembly to show consistency of the estimations

<sup>2</sup> Comparison of cluster sequences with phylogenetic groups obtained using the whole genome reference assembly as shown in Figure 1

PPYP

**Supplementary Table 6b. Cluster analysis of the PPYP motif flanking sequences of the CHO type-C ERVs following genomic DNA Illumina deep sequencing.**

| PPYP      | Illumina deep sequencing |                |                      |                                | Whole genome reference |            |                      |
|-----------|--------------------------|----------------|----------------------|--------------------------------|------------------------|------------|----------------------|
|           | Cluster                  | Absolute reads | % reads <sup>1</sup> | Predicted CRISPR-Cas9 cleavage | Presence of Myr motif  | ERV number | % reads <sup>1</sup> |
| Cluster1  | 41087                    | 10.7           | yes                  | yes                            | 10                     | 8          | Group1               |
| Cluster2  | 1857                     | 0.5            |                      | yes                            | 1                      | 1          | Group2               |
| Cluster3  | 3387                     | 0.9            | yes                  | yes                            | 7                      | 6          | Group1               |
| Cluster4  | 3406                     | 0.9            | yes                  | yes                            | 2                      | 2          | Group1               |
| Cluster5  | 4073                     | 1.1            | yes                  | yes                            | 2                      | 2          | Group1               |
| Cluster6  | 1514                     | 0.4            |                      | yes                            | 1                      | 1          | Group2               |
| Cluster7  | 169956                   | 44.1           | yes                  | yes                            | 48                     | 39         | Group1               |
| Cluster8  | 2688                     | 0.7            | yes                  | yes                            | 2                      | 2          | Group1               |
| Cluster9  | 5497                     | 1.4            | yes                  | yes                            | 3                      | 2          | Group1               |
| Cluster10 | 5038                     | 1.3            | yes                  | yes                            | 1                      | 1          | Group1               |
| Cluster11 | 2466                     | 0.6            |                      |                                | 1                      | 1          | Group2               |
| Cluster12 | 12156                    | 3.2            |                      |                                | 6                      | 5          | Group2               |
| Cluster13 | 5412                     | 1.4            |                      | yes                            | 2                      | 2          | Group2               |
| Cluster14 | 3173                     | 0.8            |                      | yes                            | 2                      | 2          | Group2               |
| Cluster15 | 1556                     | 0.4            |                      | yes                            | 1                      | 1          | Group2               |
| Cluster16 | 5251                     | 1.4            |                      | yes                            | 1                      | 1          | Group2               |
| Cluster17 | 2100                     | 0.5            |                      | yes                            | 1                      | 1          | Group2               |
| Cluster18 | 1797                     | 0.5            |                      | yes                            | 1                      | 1          | Group2               |
| Cluster19 | 2089                     | 0.5            |                      | yes                            | 1                      | 1          | Group2               |
| Cluster20 | 1969                     | 0.5            |                      | yes                            | 1                      | 1          | Group2               |
| Cluster21 | 1367                     | 0.4            |                      | yes                            | 1                      | 1          | Group2               |
| Cluster22 | 3449                     | 0.9            |                      | yes                            | 3                      | 2          | Group3               |
| Cluster23 | 27482                    | 7.1            |                      | yes                            | 12                     | 10         | Group3               |
| Cluster24 | 6739                     | 1.8            |                      |                                | 8                      | 6          | Group3               |
| Cluster25 | 2410                     | 0.6            |                      | yes                            | 1                      | 1          | Group3               |
| Cluster26 | 1493                     | 0.4            |                      | yes                            | 1                      | 1          | Group3               |
| Cluster27 | 3839                     | 1.0            |                      |                                | 3                      | 2          | Group3               |
| Cluster28 | 2030                     | 0.5            |                      | yes                            | 1                      | 1          | Group3               |
| Total     | 384960                   | 84             | 8                    | 24                             | 124                    | 100        |                      |

<sup>1</sup> Illumina Gag sequence clusters are compared to the CHO whole genome reference assembly to show consistency of the estimations

<sup>2</sup> Comparison of cluster sequences with phylogenetic groups obtained using the whole genome reference assembly as shown in Figure 1
