# Supplementary figures and images for: Characterization and mutagenesis of Chinese hamster ovary cells endogenous retroviruses to inactivate viral particle release
Source: PubMed Central journal article supplement — Biotechnol Bioeng. 2019 Nov 12;117(2):466–85. doi: 10.1002/bit.27200 (PMC7003738; doi:10.1002/bit.27200), 2019-11-12

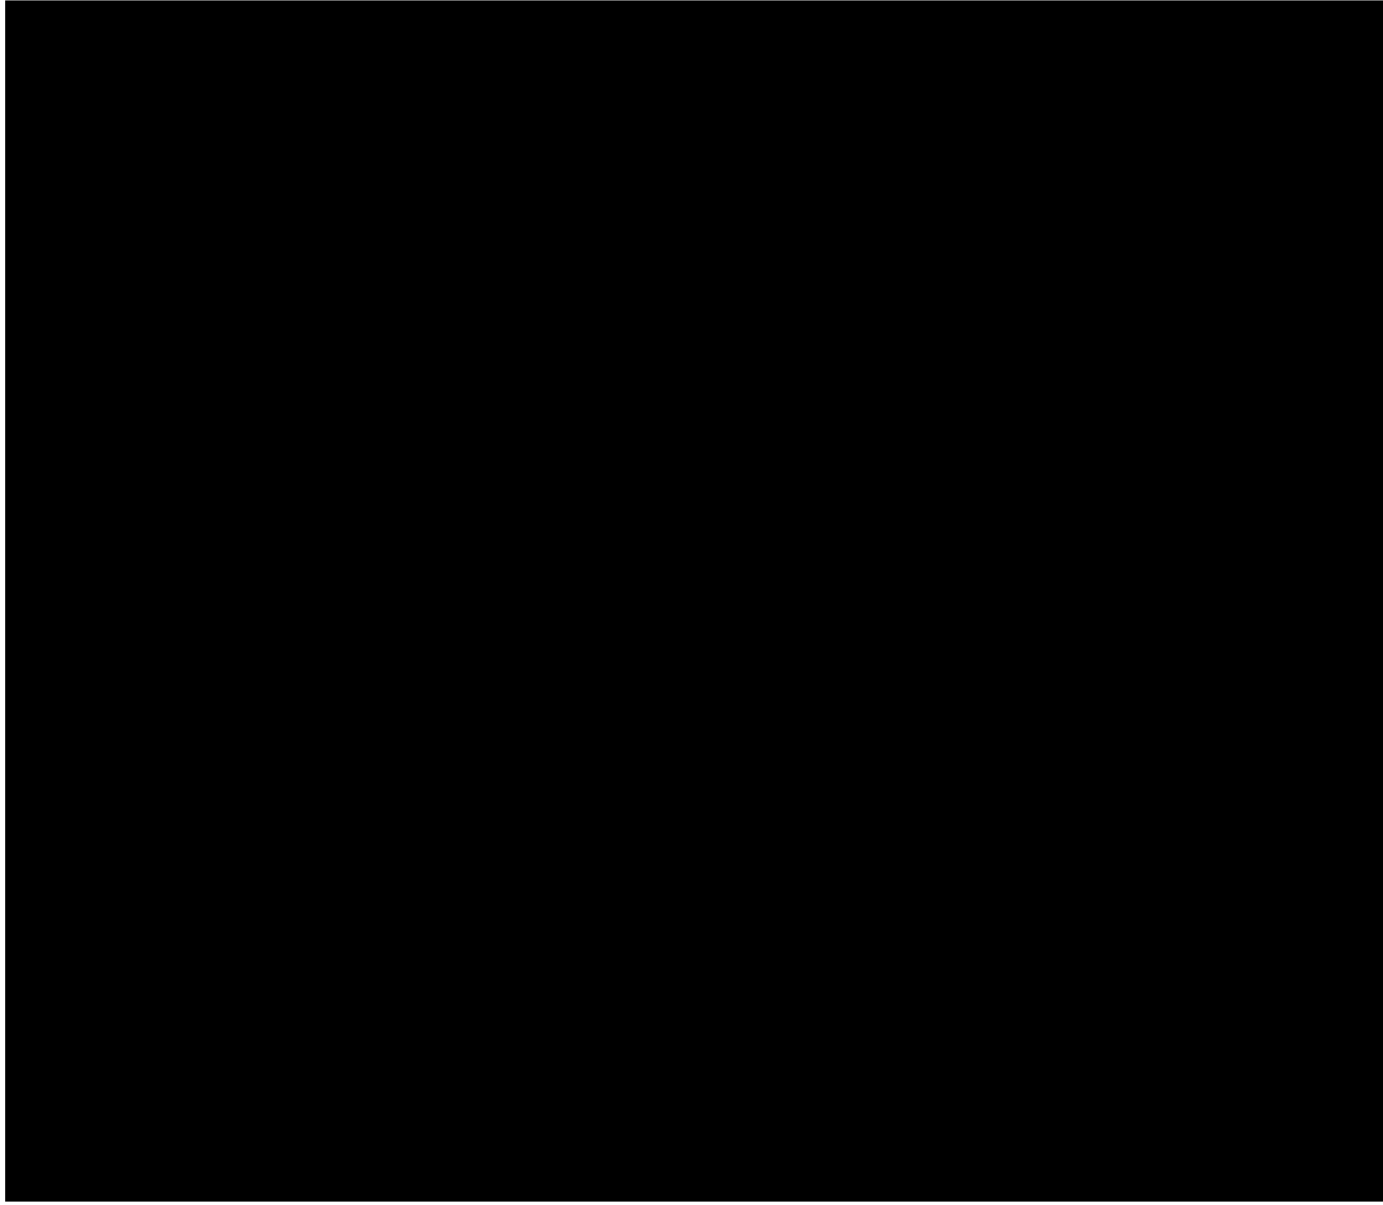

Supplement: BIT-117-466-s001.pdf [file BIT-117-466-s001.pdf]
